# Supplementary material for: Evaluation of anticoagulation status for atrial fibrillation on early ischaemic stroke outcomes: a registry-based, prospective cohort study of acute stroke care in Surrey, UK
Source: PubMed Central journal article supplement — BMJ Open. 2017 Dec 14;7(12):e019122. doi: 10.1136/bmjopen-2017-019122 (PMC5736041; doi:10.1136/bmjopen-2017-019122), 2017-12-14
Supplement: bmjopen-2017-019122.draft_revisions.pdf [file bmjopen-2017-019122.draft_revisions.pdf]

# BMJ Open

BMJ Open is committed to open peer review. As part of this commitment we make the peer review history of every article we publish publicly available.

When an article is published we post the peer reviewers' comments and the authors' responses online. We also post the versions of the paper that were used during peer review. These are the versions that the peer review comments apply to.

The versions of the paper that follow are the versions that were submitted during the peer review process. They are not the versions of record or the final published versions. They should not be cited or distributed as the published version of this manuscript.

BMJ Open is an open access journal and the full, final, typeset and author-corrected version of record of the manuscript is available on our site with no access controls, subscription charges or pay-per-view fees (<http://bmjopen.bmj.com>).

If you have any questions on BMJ Open's open peer review process please email [editorial.bmjopen@bmj.com](mailto:editorial.bmjopen@bmj.com)

# BMJ Open

## Evaluation of anticoagulation status for atrial fibrillation on early stroke outcomes

|                                 |                                                                                                                                                                                                                                                                                                                                                                                                                                                                                                                    |
|---------------------------------|--------------------------------------------------------------------------------------------------------------------------------------------------------------------------------------------------------------------------------------------------------------------------------------------------------------------------------------------------------------------------------------------------------------------------------------------------------------------------------------------------------------------|
| Journal:                        | <i>BMJ Open</i>                                                                                                                                                                                                                                                                                                                                                                                                                                                                                                    |
| Manuscript ID                   | bmjopen-2017-019122                                                                                                                                                                                                                                                                                                                                                                                                                                                                                                |
| Article Type:                   | Research                                                                                                                                                                                                                                                                                                                                                                                                                                                                                                           |
| Date Submitted by the Author:   | 14-Aug-2017                                                                                                                                                                                                                                                                                                                                                                                                                                                                                                        |
| Complete List of Authors:       | Han, Thang; Institute of Cardiovascular Research, Biological Sciences<br>Fry, Christopher; University of Bristol, School of Physiology, Pharmacology and Neuroscience<br>Fluck, David; Cardiology<br>Affley, Brendan; Stroke<br>Gulli, Giosue; Stroke<br>Barrett, Christopher; Stroke<br>Kakar, Puneet; Stroke<br>Patel, Tasmin; Institute of Cardiovascular Research, Biological Sciences<br>Sharma, Sapna; Institute of Cardiovascular Research, Biological Sciences<br>Sharma, Pankaj; Imperial College London, |
| <b>Primary Subject Heading</b>: | Cardiovascular medicine                                                                                                                                                                                                                                                                                                                                                                                                                                                                                            |
| Secondary Subject Heading:      | Pharmacology and therapeutics, Neurology, Patient-centred medicine                                                                                                                                                                                                                                                                                                                                                                                                                                                 |
| Keywords:                       | Stroke < NEUROLOGY, dysrhythmia, CVD, Length of stay in hospital, disability, mortality                                                                                                                                                                                                                                                                                                                                                                                                                            |
|                                 |                                                                                                                                                                                                                                                                                                                                                                                                                                                                                                                    |

SCHOLARONE™  
Manuscripts

only

## Evaluation of anticoagulation status for atrial fibrillation on early stroke outcomes

**Running title:** AF and stroke outcomes

Thang S Han<sup>1,2</sup>, Christopher H Fry<sup>3</sup>, David Fluck<sup>4</sup>, Brendan Affley<sup>5</sup>, Giosue Gulli<sup>5</sup>,  
Christopher Barrett<sup>6</sup>, Puneet Kakar<sup>7</sup>, Tasmin Patel<sup>1</sup>, Sapna Sharma,<sup>1</sup> Pankaj Sharma<sup>1</sup>

<sup>1</sup>Institute of Cardiovascular Research, Royal Holloway, University of London, Egham, UK.

<sup>2</sup>Department of Endocrinology, Ashford and St Peter's NHS Foundation Trust, Chertsey, UK.

<sup>3</sup>School of Physiology, Pharmacology and Neuroscience, University of Bristol, Bristol, UK.

Department of <sup>4</sup>Cardiology and <sup>5</sup>Stroke, Ashford and St Peter's NHS Foundation Trust,  
Chertsey, UK.

<sup>6</sup>Department of Stroke, NHS Frimley Health Foundation Trust, Frimley, UK.

<sup>7</sup>Department of Stroke, Epsom and St Helier University Hospitals, Epsom, UK.

**Abbreviated title:** AF treatment status and early stroke outcomes.

**Key terms:** Dysrhythmia, cardiovascular disease, length of stay in hospital, hospital  
acquired pneumonia, NIHSS, mRS, disability, mortality.

**Words:** Abstract = 250, text = 2448, **4 tables, 2 figures**

**Corresponding author:**

Dr Thang S Han

Institute of Cardiovascular Research

Royal Holloway, University of London, Egham, Surrey, TW20 0EX

Telephone: 01784443807, Email: t.s.han@doctors.org.uk

## ABSTRACT

**Objective:** We evaluated AF and anticoagulation status in relation to early outcomes in 1656 men (mean age:73.1yr±SD=13.2) and 1653 women (79.3yr±13.0) admitted with acute stroke to hyperacute stroke units (HASUs) in Surrey between 2014-2016.

**Methods:** Association between AF anticoagulation status with severe stroke on arrival (National Institutes of Health Stroke Scale score≥16), prolonged HASU stay (>3wks), urinary tract infection (UTI) and pneumonia within 7days of admission, severe disability on discharge (modified Rankin Scale score≥4), and inpatient mortality was assessed by logistic regression, adjusted for age, sex, hypertension, congestive cardiac failure, diabetes, previous stroke, and stroke subtype.

**Results:** Compared with stroke patients free from AF, those with AF without anticoagulation had an increased adjusted risk of having more severe stroke: OR=2.3 (95%CI:1.5-3.4;p<0.001), prolonged HASU stay: OR=1.4 (1.0-1.9;p=0.027) equating to 4.6days (1.6-7.6;p=0.002) longer, pneumonia: OR=2.0 (1.4-2.9;p<0.001), more severe disability: OR=1.5 (1.2-2.0;p=0.004) and mortality: OR=1.8 (1.3-2.4;p=0.001), and AF patients with anticoagulation also had greater risk for having UTI: OR=1.8 (1.2-2.7;p=0.004), pneumonia: OR=1.8 (1.3-2.5;p=0.001), more severe disability: OR=1.5 (1.2-2.0;p=0.003) and mortality: OR=2.4 (1.8-3.2;p<0.001) which was partly explained by an increased haemorrhagic stroke (23.3 v.s. 6.5%). Severe stroke was associated with greater adjusted risk of UTI by 2.7-fold (1.8-3.9;p<0.001), pneumonia 4.3-fold (1.7-6.0;p<0.001), more severe disability by 10.5-fold (7.4-15.0;p<0.001), mortality 10.0-fold (7.3-13.6;p<0.001) and prolonged HASU stay 6.6-fold (4.1-10.6;p<0.001). These relationships persisted after excluding haemorrhagic stroke from analysis.

**Conclusions:** Patients with AF, particularly those without anticoagulation, are at increased risk of severe stroke; associated with prolonged HASU stay and increased risk of early infection, disability, and mortality.

## STRENGTHS AND LIMITATIONS OF THIS STUDY

- The strengths of the present study include its large homogenous cohort of patients derived from one of the largest NHS regions in England.
- The analysis was robustly weighted for age and sex, as well as major chronic conditions known to associate with stroke including hypertension, CCF, diabetes, previous stroke and in particular stroke subtype.
- The data were collected by healthcare providers for the patients using national SSNAP protocol.
- Although data are derived only from Surrey it is likely to be representative of the rest of the UK as stroke prevalence is similar to that of the UK.
- The study did not collect information on the length of anticoagulation treatment for individual patients but it is likely that it is closely related to their age.

## INTRODUCTION

Each year, about 6.7 million people die of stroke worldwide, accounting for 11.9% of all deaths.[1] Stroke results in adverse health consequences including physical disability and cognitive impairment [2-4] which imposes enormous burdens on patients, their carers as well as social and healthcare systems.[5,6]

Patients with existing co-morbidities such as diabetes and cardiovascular diseases including coronary heart disease, poorly controlled hypertension or congestive heart failure (CCF) have an increased risk of stroke, but atrial fibrillation (AF) remains the biggest risk factor.[7,8] Although outcomes for stroke patients have improved significantly in the UK since the introduction of organised HASU care provided by multidisciplinary teams,[9,10] the elderly and those who have chronic health conditions continue to have increased risk of mortality and disability, as well as time to recovery requiring longer stay in hospital after a stroke.[11-13]

The present study aimed to evaluate the relationship of patients with AF and their anticoagulation status on the severity of stroke on admission, length of stay in hyperacute stroke unit (HASU), early disability on discharge and inpatient mortality.

## METHODS

### Patients and setting

A total of 3309 patients from Surrey, a relatively stable and homogenous population, were admitted to four HASUs within the county (one of the largest National Health Service regions in the England). The hospitals, Ashford and St Peter's (n = 1038), Frimley Park (n = 1010) and Royal Surrey County (n = 612) and Epsom (n = 649)

1  
2  
3 were surveyed between January 2014 and February 2016 for Sentinel Stroke  
4 National Audit Programme (SSNAP).[12] Twenty-two patients were admitted twice  
5 and two patients three times. For the purpose of analysis, data from the first  
6 admission for these 24 patients who were admitted multiple times were used.  
7  
8  
9  
10

### 11 12 13 14 **Socio-demographic factors and medical history**

15 All four study centres participated in SSNAP using identical protocols (available on  
16 request). Data were collected for socio-demographic factors including age at arrival,  
17 sex and ethnicity, as well as past medical history including AF, hypertension, CCF,  
18 diabetes mellitus, previous stroke and drug history including anticoagulants. In  
19 addition, details of new onset AF cases as well as urinary tract infection (UTI) and  
20 pneumonia acquired in hospital within seven days of admission were documented by  
21 the stroke team comprising consultants and stroke nurse specialists, including  
22 anticoagulation treatment from the point of admission to discharge.  
23  
24  
25  
26  
27  
28  
29  
30  
31  
32  
33  
34  
35

### 36 **Diagnosis of stroke and severity**

37 Stroke was diagnosed based on clinical presentation and brain CT scan as guided  
38 by the National Institute for Health and Care Excellence (NICE).[14] The severity of  
39 stroke symptoms was assessed by the National Institutes of Health for Stroke Scale  
40 (NIHSS) with score range from no symptoms to severe stroke symptoms (NIHSS  
41 score: 0 to 42).  
42  
43  
44  
45  
46  
47  
48  
49  
50  
51  
52  
53  
54  
55  
56  
57  
58  
59  
60

### Disability and mortality

Degree of disability or dependence in daily activities were assessed by a modified Rankin Scale (mRS), ranging from no symptoms to severe symptoms (mRS score: 0 to 5) and mortality (mRS score: 6).

### Categorisation of variables

Dichotomisation was applied for hypertension, CCF and diabetes according to the presence of history of the condition or not while age was dichotomised at the median value (<79 and ≥79 years). AF and anticoagulation status were categorised into four groups: free from AF; AF with anticoagulation; AF without anticoagulation; and AF unsuitable for anticoagulation. Severity of stroke and disability were dichotomised into two groups: no symptoms to moderate symptoms (NIHSS score <16 and mRS score <4) and moderately-severe to severe (NIHSS score ≥16 and mRS score ≥4). Prolonged stay in HASU was defined as patients who stayed in a HASU >3 weeks (upper fourth quartile of length of stay).

### Statistical analysis

The frequency of patients with AF using anticoagulation before developing an ischaemic or haemorrhagic stroke was assessed by cross tabulation and chi-squared tests. Most variables had no missing data, except for information on type of stroke (1%), which were handled in analysis using a 'listwise deletion of missing data' approach.[15] Independent *t*-tests were performed to compare differences between two groups and analysis of variance (ANOVA) between three or more groups, with *post-hoc* analysis where applicable. Multivariable logistic regression was performed to assess the risk of moderately-severe to severe stroke on arrival



1  
2  
3 and disability on discharge, inpatient mortality after stroke and prolonged stay in  
4 HASU (dependent variables) from co-morbidities including AF, hypertension, CCF,  
5 diabetes and previous stroke (independent variables). Two logistic regression  
6 models were conducted, the first model was adjusted for age, sex, co-morbidities  
7 and stroke subtype (ischaemic and haemorrhagic) and the second model was a  
8 repeat of the first but haemorrhagic stroke cases were excluded, *i.e.* only ischaemic  
9 stroke patients were analysed (without stroke subtype as a confounding factor).  
10 Analyses were performed using SPSS V.22.0 (SPSS Inc, Chicago, Illinois, USA).  
11 The null hypothesis was rejected when  $p < 0.05$ .  
12  
13  
14  
15  
16  
17  
18  
19  
20  
21  
22  
23  
24

## 25 RESULTS

26  
27 Admissions for stroke were equally distributed between men and women, with the  
28 onset of the first stroke 6.1 years (95% CI: 5.2, 7.0,  $p < 0.001$ ) earlier in men (**Table**  
29 **1**). There were 76.9% of patients presented with first stroke and 23.1% with recurrent  
30 stroke: 83.3% with ischaemic stroke, 15.7% haemorrhagic stroke and 1%  
31 unspecified. Most patients were white Caucasians (92.1%) with the remaining 6.8%  
32 comprises mixed race, Black, Asian and other ethnic populations, and 1.2% not  
33 stated. On arrival, 666 (20.1%) patients had a history of AF, in whom 45.3% were  
34 treated in the community with an anticoagulant whilst 54.7% were untreated although  
35 12.8% had been considered for anticoagulation and deemed unsuitable by their  
36 healthcare providers. Also on arrival, 7.7% of patients had moderate to severe stroke  
37 symptoms (NIHSS score 16-20) and 6.9% had severe symptoms (NIHSS 21-42).  
38 The remainder had no symptoms (13.4%, NIHSS 0); minor (38.2%, NIHSS 1-4) or  
39 moderate (33.8%, NIHSS 5-15) symptoms: a more detailed analysis of NIHSS  
40 scores is shown in **Figure 1**. The median length of stay in a HASU was 6.9 days  
41  
42  
43  
44  
45  
46  
47  
48  
49  
50  
51  
52  
53  
54  
55  
56  
57  
58  
59  
60

1  
2  
3 (interquartile range 2.7, 21.0) with a quarter of patients stayed >3 weeks (prolonged  
4 stay). On discharge 11.2% and 4.9% of the original patients respectively had  
5 moderately severe (mRS score: 4) or severe (mRS score: 5) symptoms. The rate of  
6 inpatient mortality was 15.1%. (**Table 1**).

7  
8  
9  
10  
11  
12  
13  
14 Patients free from AF had significantly less severe stroke on admission as reflected  
15 by a lower NIHSS score ( $F = 19.2$ ,  $p < 0.001$ ) and disability on discharge as indicated  
16 by a lower mRS score ( $F = 25.7$ ,  $p < 0.001$ ) than patients with AF of any  
17 anticoagulation status (with anticoagulation, without anticoagulation or unsuitable for  
18 anticoagulation in the community) (**Figure 2**). ANOVA with *post-hoc* analysis by least  
19 significant difference tests showed that NIHSS score on arrival (**Figure 2a**) and mRS  
20 on discharge (**Figure 2b**) were significantly lower ( $p < 0.001$ ) for those free from AF  
21 compared with any of the other three groups of patients with AF (with  
22 anticoagulation, without anticoagulation or unsuitable for anticoagulation). The  
23 NIHSS score for those with AF who were treated with anticoagulant was also lower  
24 ( $p = 0.049$ ) than that of those with AF without anticoagulation.

25  
26  
27  
28  
29  
30  
31  
32  
33  
34  
35  
36  
37  
38  
39  
40  
41 **Table 2** shows that compared with stroke patients free of AF, those with AF but not  
42 anticoagulated had an increased adjusted risk of having more severe stroke (NIHSS  
43 score  $\geq 16$ ): OR = 2.3 (95%CI: 1.5-3.4,  $p < 0.001$ ), prolonged stay in HASU (>3  
44 weeks): OR = 1.4 (1.0-1.9,  $p = 0.027$ ) equating to 4.6 (1.6-7.6) days longer ( $p =$   
45 0.002), pneumonia: OR = 2.0 (1.4-2.9;  $p < 0.001$ ), more severe disability: OR = 1.5  
46 (1.2-2.0;  $p = 0.004$ ) and mortality: OR = 1.8 (1.3-2.4;  $p = 0.001$ ). Patients with AF with  
47 anticoagulation also had greater risk than those free of AF for having UTI: OR = 1.8  
48 (1.2-2.7;  $p = 0.004$ ), pneumonia: OR = 1.8 (1.3-2.5;  $p = 0.001$ ), more severe disability:  
49  
50  
51  
52  
53  
54  
55  
56  
57  
58  
59  
60

1  
2  
3 OR = 1.5 (1.2-2.0;  $p=0.003$ ) and mortality: OR = 2.4 (1.8-3.2;  $p<0.001$ ) which was  
4 partly explained by an increased haemorrhagic stroke (23.3 v.s. 6.5%). After the  
5 exclusion of haemorrhagic stroke cases, these ORs diminished to 1.2-fold (0.9-1.7,  $p$   
6 = 0.198) for disability and 1.9-fold (1.4-2.8,  $p <0.001$ ) for mortality. Significant  
7 relationships between AF patients without anticoagulation and the remaining  
8 outcomes continued to persist after excluding haemorrhagic stroke patients from  
9 analysis (**Model 2, Table 2**).

10  
11  
12  
13  
14  
15  
16  
17  
18  
19  
20  
21  
22  
23  
24  
25  
26  
27  
28  
29  
30  
31  
32  
33  
34  
35  
36  
37  
38  
39  
40  
41  
42  
43  
44  
45  
46  
47  
48  
49  
50  
51  
52  
53  
54  
55  
56  
57  
58  
59  
60  
Logistic regression with adjustment of age, sex, co-morbidities including AF status  
and stroke subtype showed that patient with severe stroke on arrival were at greater  
risk of UTI by 2.7-fold (1.8-3.9;  $p<0.001$ ), pneumonia 4.3-fold (1.7-6.0;  $p<0.001$ ), more  
severe disability by 10.5-fold (7.4-15.0;  $p<0.001$ ), mortality 10.0-fold (7.3-  
13.6;  $p<0.001$ ) and prolonged HASU stay 6.6-fold (4.1-10.6;  $p<0.001$ ) (**Model 1,**  
**Table 3**). Excluding haemorrhagic stroke cases from analysis resulted in minor  
changes to these ORs (**Model 2, Table 3**).

Longer stay in HASU was found in stroke patients with AF without anticoagulant than  
those free from AF by 4.6 days (1.6-7.6,  $p = 0.002$ ) while anticoagulation in patients  
with AF reduced the length of stay in HASU to the same level of that observed in  
patients free from AF (*i.e.* no significant differences in length of stay between these  
two groups). Compared with the less severe stroke (NIHSS score  $<16$ ) group of  
patients, those with more severe stroke (NIHSS score  $\geq 16$ ) stayed in HASU longer  
by 20.2 days (15.6-24.7,  $p <0.001$ ) (**Table 4**). Similar results were observed for  
length of hospital stay (results not shown).

## DISCUSSION

We show that compared to patients without a history of AF, those with AF without anticoagulation had a greater risk of severe stroke (NIHSS score  $\geq 16$ ), prolonged stay in HASU ( $>3$  weeks), risk of early pneumonia, more severe disability on discharge (mRS score  $\geq 4$ ) and inpatient mortality by 1.4- to 2.4-fold. It is notable that AF patients who were anticoagulated reduced their risk of severe stroke and length of stay in a HASU to the same level as those who were free from AF. In turn, compared with patients with less severe stroke, those with severe stroke had an increased risk of prolonged stay in HASU by 6.5-fold, early hospital acquired infections by 3- to 4-fold, having more severe disability on discharge by 10.5-fold and mortality by 10-fold. The increased risk of severe stroke on arrival, prolonged stay in HASU, more severe disability on discharge and inpatient mortality in patients with AF without anticoagulation was independent of age, sex, hypertension, CCF, diabetes, previous stroke and haemorrhagic stroke.

Given the growing ageing population,[16] disability from stroke will continue to impose massive burdens on healthcare systems in the foreseeable future worldwide, including the UK. There is therefore a need for early identification of AF, the biggest treatable risk factor of stroke, through systematic screening of at-risk patients in the community and intensive treatment for those diagnosed with AF.[17] However, there is evidence of under-treatment of AF in the community indicated in our recent study of this cohort of patients. We found a high proportion (95%) of AF patients who were not on anticoagulation in the community were anticoagulated on discharge after admission for acute stroke (**Han et al, 2017 unpublished**). Similar findings were observed in other studies including that of Perez et al who found that only 50% of

1  
2  
3 patients with AF who were eligible for anticoagulation were given this treatment,[18]  
4  
5 while Waldo et al studied 945 patients and found that of the 86% of patients who  
6  
7 were at high risk of stroke, only 55% received warfarin.[19] Greater collaboration  
8  
9 between primary care and specialist cardiology services is necessary to improve  
10  
11 stroke prevention through appropriate treatment of AF, particularly weighing up  
12  
13 benefit: risk ratio for patients who pose as a treatment dilemma for anticoagulation,  
14  
15 such as those with a history of bleeding. Other preventable risk factors such as  
16  
17 obesity, hypertension, dyslipidaemia and hyperglycaemia/insulin resistance  
18  
19 [17,20,21] should also be managed intensively.  
20  
21  
22  
23  
24

25 A number of important findings emerge from the present study. All patients with AF,  
26  
27 whether treated or untreated with an anticoagulant, have increased risks of early  
28  
29 hospital acquired infections, disability and mortality. This suggests the inherent risk  
30  
31 of AF that may be associated with other causes of cardiovascular disease leads to  
32  
33 worse outcomes of stroke.[22] The increased risk of mortality in patients with AF who  
34  
35 were treated with anticoagulation is partly due to the greater occurrence of  
36  
37 haemorrhagic stroke associated with anticoagulation as shown in our study, and is a  
38  
39 well-recognised adverse effect of anticoagulation.[23,24] In the present study, we  
40  
41 conducted two models of logistic regression to minimise the confounding effect of  
42  
43 haemorrhagic stroke on the outcomes. When haemorrhagic stroke cases were  
44  
45 excluded from analysis (15.7% of the sample), the risk for severe disability on  
46  
47 discharge and mortality observed in stroke patients with AF who were treated with  
48  
49 anticoagulant was reduced substantially (in the case of disability, to non-significant  
50  
51 level). In addition, we observed that there was no greater risk for having more severe  
52  
53 stroke or prolonged stay in HASU among stroke patients with AF who were  
54  
55  
56  
57  
58  
59  
60

1  
2  
3 anticoagulated than that of those who were free of AF; this evidence reinforces the  
4  
5 value of intensive treatment of AF with anticoagulants.[25]  
6  
7

8  
9  
10 The strengths of the present study include its large homogenous cohort of patients  
11  
12 derived from one of the largest NHS regions in England. The analysis was robustly  
13  
14 weighted for age and sex, as well as major chronic conditions known to associate  
15  
16 with stroke including hypertension, CCF, diabetes, previous stroke and in particular  
17  
18 stroke subtype. The data were collected by healthcare providers for the patients  
19  
20 using national SSNAP protocol. Our study focused on early disability on discharge  
21  
22 and inpatient mortality. It would be of interest to assess the impact of AF  
23  
24 anticoagulation status on these outcomes in longer term. Although data are derived  
25  
26 only from Surrey it is likely to be representative of the rest of the UK as stroke  
27  
28 prevalence is similar to that of the UK.[12] The study did not collect information on  
29  
30 the length of anticoagulation treatment for individual patients but it is likely that it is  
31  
32 closely related to their age. We chose cutoff point for NIHSS score at 16 based on  
33  
34 previous studies showing that a baseline score of  $\geq 16$  (moderately-severe to severe  
35  
36 stroke) was a strong predictor of mortality or severe disability,[26] while cutoff point  
37  
38 for mRS score at 4 indicates that beyond this point, functional disability begins to  
39  
40 worsen due to increasing severity of stroke.[27] "Prolonged stay" has variably been  
41  
42 described.[28] In the present study, we defined prolonged stay for those who stayed  
43  
44 in HASU  $>3$  weeks as this point reflects the upper quartile of length of stay in HASU.  
45  
46 It should be emphasised that these cutoff points tend to be arbitrary and the higher  
47  
48 the level, the more severe is the condition. We have explored various other levels  
49  
50 including cutoff points for NIHSS score at 12, mRS score at 3 and length of stay in  
51  
52  
53  
54  
55  
56  
57  
58  
59  
60

1  
2  
3 HASU at 1 week (50<sup>th</sup> centile) all showing similar patterns of, but weaker, association  
4  
5 with AF treatment status.  
6  
7

8  
9  
10 In conclusion, patients with AF, particularly those without anticoagulation, are at  
11 increased risk of severe stroke; associated with prolonged HASU stay and increased  
12 risk of early infection, disability, and mortality.  
13  
14  
15  
16  
17  
18  
19  
20  
21  
22  
23  
24  
25  
26  
27  
28  
29  
30  
31  
32  
33  
34  
35  
36  
37  
38  
39  
40  
41  
42  
43  
44  
45  
46  
47  
48  
49  
50  
51  
52  
53  
54  
55  
56  
57  
58  
59  
60

1  
2  
3 **Acknowledgements:** The authors wish to thank patients and all those who were  
4 involved in the surveys in the study and Dr Adrian Blight (currently at Department of  
5 Stroke, St George's University Hospitals NHS Foundation Trust) for his contribution  
6 towards data collection from Royal Surrey County Hospital Foundation Trust.  
7  
8  
9  
10

11  
12  
13  
14 **Contributorship:** TSH and PS reviewed the topic related literature. BA, GG, CB, PK  
15 and TP performed the study coordination and data collection. TSH and PS performed the  
16 study concept and analysis design. TSH wrote the first draft, analysed and interpreted  
17 the data and revised the manuscript. CHF and PS edited the manuscript. All authors  
18 checked, interpreted results and approved the final version. TSH and PS are the  
19 guarantors for the study.  
20  
21  
22  
23  
24  
25  
26  
27  
28  
29  
30  
31

32 **Funding:** None.  
33  
34  
35  
36

37 **Competing interests:** The authors declared no potential conflicts of interest with  
38 respect to the research, authorship, and publication of this paper.  
39  
40  
41  
42  
43  
44

45 **Provenance and peer review:** Not commissioned; externally peer reviewed.  
46  
47  
48  
49  
50

51 **Data sharing statement:** No additional data are available.  
52  
53  
54  
55  
56  
57  
58  
59  
60



## REFERECEES

1. [www.who.int/gho/ncd/mortality\\_morbidity/cvd/en/](http://www.who.int/gho/ncd/mortality_morbidity/cvd/en/).
2. Lin HJ, Wolf PA, Kelly-Hayes M, et al. Stroke severity in atrial fibrillation. The Framingham Study. *Stroke* 1996; **27**: 1760-1764.
3. Lamassa M, Di Carlo A, Pracucci G, et al. Characteristics, outcome, and care of stroke associated with atrial fibrillation in Europe: data from a multicenter multinational hospital-based registry (The European Community Stroke Project). *Stroke* 2001; **32**: 392–398.
4. Crichton SL, Bray BD, McKeivitt C, et al. Patient outcomes up to 15 years after stroke: survival, disability, quality of life, cognition and mental health. *J Neurol Neurosurg Psychiatry* 2016; **87**: 1091-1098.
5. Youman P, Wilson K, Harraf F, et al. The economic burden of stroke in the United Kingdom. *Pharmacoeconomics* 2003; **21 Suppl 1**: 43-50.
6. Saka O, McGuire A, Wolfe C. Cost of stroke in the United Kingdom. *Age Ageing* 2009; **38**: 27-32.
7. Wolf PA, Abbott RD, Kannel WB. Atrial fibrillation as an independent risk factor for stroke: the Framingham Study. *Stroke* 1991; **22**: 983-988.
8. Anon. Risk factors for stroke and efficacy of antithrombotic therapy in atrial fibrillation: analysis of pooled data from five randomized controlled trials. *Arch Intern Med* 1994; **154**: 1449-1457.
9. Stroke unit trialists' collaboration. Organised inpatient (stroke unit) care for stroke. In: *Cochrane Library*. Issue 1, 2007.
10. Turner M, Barber M, Dodds H, et al; Scottish Stroke Care Audit. The impact of stroke unit care on outcome in a Scottish stroke population, taking into account case mix and selection bias. *J Neurol Neurosurg Psychiatry* 2015; **86**: 314-318.

- 1  
2  
3 11. Maeshima S, Osawa A, Hayashi T, et al. Elderly age, bilateral lesions, and  
4 severe neurological deficit are correlated with stroke-associated pneumonia. *J*  
5 *Stroke Cerebrovasc Dis* 2014; **23**: 484-489.  
6  
7
- 8  
9  
10 12. Royal College of Physicians, Clinical Effectiveness and Evaluation Unit on behalf  
11 of the Intercollegiate Stroke Working Party. Based on stroke patients admitted to  
12 and/or discharged from hospital between January - March 2016. SSNAP  
13 January - March 2016 Public Report (June 2016).  
14  
15
- 16  
17  
18 13. Tam AKH, Bayley MT. A narrative review of the impact of medical comorbidities  
19 on stroke rehabilitation outcomes. *Disabil Rehabil* 2017; **4**: 1-7.  
20  
21
- 22  
23 14. National-Institute-for-Health-and-Care-Excellence. Atrial fibrillation: the  
24 management of atrial fibrillation. 2014. <http://guidance.nice.org.uk/CG180>  
25 (Clinical guideline 180).  
26  
27
- 28  
29  
30 15. Acock AC. Working with missing values. *J Marriage Fam* 2005; **67**: 1012-1028.  
31
- 32  
33 16. World Health Organization. "World report on ageing and health." *Geneva: World*  
34 *Health Organization* (2015).  
35
- 36  
37  
38 17. Feigin VL, Roth GA, Naghavi M, et al; Global Burden of Diseases, Injuries and  
39 Risk Factors Study 2013 and Stroke Experts Writing Group. Global burden of  
40 stroke and risk factors in 188 countries, during 1990-2013: a systematic analysis  
41 for the Global Burden of Disease Study 2013. *Lancet Neurol* 2016; **15**: 913-924.  
42  
43
- 44  
45  
46 18. Perez I, Melbourn A, Kalra L. Use of antithrombotic measures for stroke  
47 prevention in atrial fibrillation. *Heart* 1999; **82**: 570-574.  
48
- 49  
50  
51 19. Waldo AL, Becker RC, Tapson VF, et al; NABOR Steering Committee.  
52 Hospitalized patients with atrial fibrillation and a high risk of stroke are not being  
53 provided with adequate anticoagulation. *J Am Coll Cardiol* 2005; **46**: 1729-1736.  
54  
55  
56  
57  
58  
59  
60

- 1  
2  
3 20. Weir CJ, Murray GD, Dyker AG, et al. Is hyperglycaemia an independent  
4 predictor of poor outcome after acute stroke? Results of a long-term follow up  
5 study. *BMJ* 1997; **314**: 1303-1306.  
6  
7  
8  
9  
10 21. Millionis HJ, Rizos E, Goudevenos J, et al. Components of the metabolic  
11 syndrome and risk for first-ever acute ischemic nonembolic stroke in elderly  
12 subjects. *Stroke* 2005; **36**: 1372-1376.  
13  
14  
15  
16 22. Kamel H, Okin PM, Elkind MS, et al. Atrial fibrillation and mechanisms of stroke:  
17 time for a new model. *Stroke* 2016; **47**: 895-900.  
18  
19  
20  
21 23. Hart RG, Diener HC, Yang S, et al. Intracranial hemorrhage in atrial fibrillation  
22 patients during anticoagulation with warfarin or dabigatran: the RE-LY trial.  
23 *Stroke* 2012; **43**: 1511-1517.  
24  
25  
26  
27 24. Hankey GJ, Stevens SR, Piccini JP, et al; ROCKET AF Steering Committee and  
28 Investigators. Intracranial hemorrhage among patients with atrial fibrillation  
29 anticoagulated with warfarin or rivaroxaban: the rivaroxaban once daily, oral,  
30 direct factor Xa inhibition compared with vitamin K antagonism for prevention of  
31 stroke and embolism trial in atrial fibrillation. *Stroke* 2014; **45**: 1304-1312.  
32  
33  
34  
35  
36  
37  
38 25. Hylek EM, Go AS, Chang Y, et al. Effect of intensity of oral anticoagulation on  
39 stroke severity and mortality in atrial fibrillation. *N Engl J Med* 2003; **349**: 1019-  
40 1026.  
41  
42  
43  
44  
45 26. Adams HP Jr, Bendixen BH, Leira E, et al. Antithrombotic treatment of ischemic  
46 stroke among patients with occlusion or severe stenosis of the internal carotid  
47 artery: A report of the Trial of Org 10172 in Acute Stroke Treatment (TOAST).  
48 *Neurology* 1999; **53**: 122-125.  
49  
50  
51  
52  
53  
54 27. Fernandez A1, Schmidt JM, Claassen J, et al. Fever after subarachnoid  
55 hemorrhage: risk factors and impact on outcome. *Neurology* 2007; **68**: 1013-9.  
56  
57  
58  
59  
60

- 1  
2  
3 28. Stein M, Misselwitz B, Hamann GF, et al. Defining prolonged length of acute  
4 care stay for surgically and conservatively treated patients with spontaneous  
5 intracerebral hemorrhage: a population-based analysis. *Biomed Res Int* 2016;  
6  
7  
8  
9  
10 2016:9095263.  
11  
12  
13  
14  
15  
16  
17  
18  
19  
20  
21  
22  
23  
24  
25  
26  
27  
28  
29  
30  
31  
32  
33  
34  
35  
36  
37  
38  
39  
40  
41  
42  
43  
44  
45  
46  
47  
48  
49  
50  
51  
52  
53  
54  
55  
56  
57  
58  
59  
60

## LEGENDS

**Figure 1.** Distribution of patients against severity of stroke on admission based on NIHSS score.

**Figure 2.** Box plots showing AF and anticoagulation status in relation to stroke severity on arrival indicated by NIHSS score (a) and severity of disability on discharge indicated by mRS score (b). ANOVA showed significant group differences ( $p < 0.001$ ) therefore *post hoc* least significant difference tests were performed to compare NIHSS score between those †free from AF (No AF) and other three AF groups of different anticoagulation status, and between \*AF with anticoagulation (AF-treated) and AF without anticoagulation (AF-untreated) groups. Box plots representing median and interquartile ranges; whiskers represent the 5th and 95th percentiles.

**Table 1.** Distribution of 3309 patients, 1656 men (mean age: 73.1 years  $\pm$ SD 13.2) and 1653 women (79.3 years  $\pm$ 13.0), admitted with acute stroke to hospitals in Surrey between January 2014 and February 2016.

|                                                      | n             | Proportion (%) |
|------------------------------------------------------|---------------|----------------|
| Men: women                                           | 1650: 1653    | 50.0: 50.0     |
| Caucasian: mixed race: not stated                    | 3046: 95: 129 | 92.1: 2.9: 3.9 |
| First stroke/TIA: Recurrent stroke/TIA               | 2543: 766     | 76.9: 23.1     |
| Ischaemic stroke: haemorrhagic stroke                | 2758: 518     | 83.3: 15.7     |
| Atrial fibrillation                                  | 666           | 20.1           |
| AF with anticoagulation                              | 302           | 45.3           |
| AF without anticoagulation                           | 279           | 41.9           |
| AF not suitable for anticoagulation                  | 85            | 12.8           |
| Hypertension                                         | 1729          | 52.3           |
| CCF                                                  | 194           | 5.9            |
| Diabetes                                             | 531           | 16.0           |
| <b>Stroke severity on arrival</b>                    |               |                |
| No stroke symptoms (NIHSS score: 0)                  | 444           | 13.4           |
| Minor stroke (NIHSS score: 1-4)                      | 1263          | 38.2           |
| Moderate stroke (NIHSS score: 5-15)                  | 1120          | 33.8           |
| Moderate to severe stroke (NIHSS score: 16-20)       | 255           | 7.7            |
| Severe stroke (NIHSS score: 21-42)                   | 227           | 6.9            |
| <b>Modified Rankin Scale on discharge (n = 3174)</b> |               |                |
| No symptoms (mRS score: 0)                           | 760           | 23.9           |
| No significant disability (mRS: 1)                   | 553           | 17.4           |
| Slight disability (mRS score: 2)                     | 448           | 14.1           |
| Moderate disability (mRS score: 3)                   | 424           | 13.4           |
| Moderately severe disability (mRS score: 4)          | 355           | 11.2           |
| Severe disability (mRS score: 5)                     | 154           | 4.9            |
| Dead (mRS score: 6)                                  | 480           | 15.1           |

**Table 2.** Chi-squared test and logistic regression to assess the association of AF and anticoagulation status with moderately-severe to severe stroke (NIHSS score  $\geq 16$ ), UTI and pneumonia within seven days of admission, prolonged stay in HASU, moderately-severe to severe disability (mRS score  $\geq 4$ ) on discharge and mortality.

|                                                                                                | Proportion of cases and $\chi^2$ test for group differences |             |                  | Model 1: Adjusted for age, sex, co-morbidities <sup>†</sup> and stroke subtype in all patients |                  |                  | Model 2: Adjusted for age, sex, co-morbidities <sup>†</sup> in ischaemic stroke patients* |                  |                  |
|------------------------------------------------------------------------------------------------|-------------------------------------------------------------|-------------|------------------|------------------------------------------------------------------------------------------------|------------------|------------------|-------------------------------------------------------------------------------------------|------------------|------------------|
|                                                                                                | %                                                           | $\chi^2$    | <i>p</i>         | OR                                                                                             | 95% CI           | <i>p</i>         | OR                                                                                        | 95% CI           | <i>p</i>         |
| <b>Severe stroke on arrival (NIHSS <math>\geq 16</math>) (n = 227)</b>                         |                                                             |             |                  |                                                                                                |                  |                  |                                                                                           |                  |                  |
| Free from AF                                                                                   | 5.8                                                         | <b>29.8</b> | <b>&lt;0.001</b> | 1                                                                                              | --               | --               | 1                                                                                         | --               | --               |
| AF with anticoagulation                                                                        | 8.9                                                         |             |                  | 1.31                                                                                           | 0.84-2.04        | 0.233            | 1.24                                                                                      | 0.72-2.13        | 0.440            |
| AF without anticoagulation                                                                     | 14.0                                                        |             |                  | <b>2.28</b>                                                                                    | <b>1.54-3.37</b> | <b>&lt;0.001</b> | <b>2.42</b>                                                                               | <b>1.60-3.64</b> | <b>&lt;0.001</b> |
| AF not suitable for anticoagulation                                                            | 9.4                                                         |             |                  | 1.41                                                                                           | 0.663-0.3        | 0.373            | 1.31                                                                                      | 0.55-3.14        | 0.539            |
| <b>Prolonged stay in HASU (&gt;3 weeks) (n = 657)</b>                                          |                                                             |             |                  |                                                                                                |                  |                  |                                                                                           |                  |                  |
| Free from AF                                                                                   | 23.9                                                        | <b>10.6</b> | <b>0.014</b>     | 1                                                                                              | --               | --               | 1                                                                                         | --               | --               |
| AF with anticoagulation                                                                        | 25.6                                                        |             |                  | 0.92                                                                                           | 0.65-1.30        | 0.640            | 0.87                                                                                      | 0.59-1.28        | 0.475            |
| AF without anticoagulation                                                                     | 33.2                                                        |             |                  | <b>1.42</b>                                                                                    | <b>1.04-1.94</b> | <b>0.027</b>     | <b>1.42</b>                                                                               | <b>1.03-1.97</b> | <b>0.034</b>     |
| AF not suitable for anticoagulation                                                            | 32.2                                                        |             |                  | 1.22                                                                                           | 0.69-2.15        | 0.503            | 1.42                                                                                      | 0.79-2.58        | 0.242            |
| <b>UTI within 7 days of admission (n = 243)</b>                                                |                                                             |             |                  |                                                                                                |                  |                  |                                                                                           |                  |                  |
| Free from AF                                                                                   | 6.2                                                         | <b>45.3</b> | <b>&lt;0.001</b> | 1                                                                                              | --               | --               | 1                                                                                         | --               | --               |
| AF with anticoagulation                                                                        | 13.4                                                        |             |                  | <b>1.80</b>                                                                                    | <b>1.21-2.68</b> | <b>0.004</b>     | <b>1.88</b>                                                                               | <b>1.18-2.97</b> | <b>0.007</b>     |
| AF without anticoagulation                                                                     | 10.5                                                        |             |                  | 1.38                                                                                           | 0.89-2.13        | 0.151            | 1.49                                                                                      | 0.95-2.33        | 0.081            |
| AF not suitable for anticoagulation                                                            | 21.3                                                        |             |                  | <b>3.26</b>                                                                                    | <b>1.81-5.85</b> | <b>&lt;0.001</b> | <b>2.96</b>                                                                               | <b>1.55-5.65</b> | <b>0.001</b>     |
| <b>Pneumonia within 7 days of admission (n = 358)</b>                                          |                                                             |             |                  |                                                                                                |                  |                  |                                                                                           |                  |                  |
| Free from AF                                                                                   | 9.0                                                         | <b>73.2</b> | <b>&lt;0.001</b> | 1                                                                                              | --               | --               | 1                                                                                         | --               | --               |
| AF with anticoagulation                                                                        | 19.0                                                        |             |                  | <b>1.81</b>                                                                                    | <b>1.29-2.54</b> | <b>0.001</b>     | <b>1.60</b>                                                                               | <b>1.06-2.40</b> | <b>0.025</b>     |
| AF without anticoagulation                                                                     | 19.3                                                        |             |                  | <b>2.03</b>                                                                                    | <b>1.44-2.87</b> | <b>&lt;0.001</b> | <b>2.05</b>                                                                               | <b>1.44-2.94</b> | <b>&lt;0.001</b> |
| AF not suitable for anticoagulation                                                            | 28.8                                                        |             |                  | <b>3.18</b>                                                                                    | <b>1.89-5.36</b> | <b>&lt;0.001</b> | <b>3.04</b>                                                                               | <b>1.73-5.37</b> | <b>&lt;0.001</b> |
| <b>Moderately-severe to severe disability on discharge (mRS <math>\geq 4</math>) (n = 181)</b> |                                                             |             |                  |                                                                                                |                  |                  |                                                                                           |                  |                  |
| Free from AF                                                                                   | 26.8                                                        | <b>26.9</b> | <b>&lt;0.001</b> | 1                                                                                              | --               | --               | 1                                                                                         | --               | --               |
| AF with anticoagulation                                                                        | 43.7                                                        |             |                  | <b>1.49</b>                                                                                    | <b>1.20-2.02</b> | <b>0.003</b>     | 1.20                                                                                      | 0.90-1.66        | 0.198            |
| AF without anticoagulation                                                                     | 40.5                                                        |             |                  | <b>1.50</b>                                                                                    | <b>1.14-1.96</b> | <b>0.004</b>     | <b>1.56</b>                                                                               | <b>1.18-2.06</b> | <b>0.002</b>     |
| AF not suitable for anticoagulation                                                            | 42.4                                                        |             |                  | 1.47                                                                                           | 0.92-2.33        | 0.107            | 1.60                                                                                      | 0.97-2.62        | 0.065            |
| <b>Inpatient mortality (n = 480)</b>                                                           |                                                             |             |                  |                                                                                                |                  |                  |                                                                                           |                  |                  |

|                                     |      |             |                  |             |                  |                  |             |                  |                  |
|-------------------------------------|------|-------------|------------------|-------------|------------------|------------------|-------------|------------------|------------------|
| Free from AF                        | 11.8 | <b>88.5</b> | <b>&lt;0.001</b> | 1           | --               | --               | 1           | --               | --               |
| AF with anticoagulation             | 29.8 |             |                  | <b>2.38</b> | <b>1.78-3.20</b> | <b>&lt;0.001</b> | <b>1.94</b> | <b>1.35-2.78</b> | <b>&lt;0.001</b> |
| AF without anticoagulation          | 21.1 |             |                  | <b>1.75</b> | <b>1.26-2.43</b> | <b>0.001</b>     | <b>1.86</b> | <b>1.32-2.61</b> | <b>&lt;0.001</b> |
| AF not suitable for anticoagulation | 23.5 |             |                  | <b>1.82</b> | <b>1.06-3.13</b> | <b>0.030</b>     | <b>1.83</b> | <b>1.01-3.30</b> | <b>0.046</b>     |

\*Exclusion of 518 (15.7%) haemorrhagic stroke patients; †Co-morbidities: CCF, hypertension, diabetes and previous stroke.

For peer review only



**Table 3.** Chi-squared test and logistic regression to assess the association of stroke severity on arrival with UTI and pneumonia with seven days of admission, length of stay in HASU, disability on discharge and inpatient mortality.

|                                                                     | Proportion of cases (%) and chi-squared test for group differences |              |                  | Model 1: logistic regression adjusted for age, sex, co-morbidities <sup>†</sup> and stroke subtype in all patients |                   |                  | Model 2: logistic regression adjusted for age, sex, co-morbidities <sup>†</sup> in ischaemic stroke patients |                   |                  |
|---------------------------------------------------------------------|--------------------------------------------------------------------|--------------|------------------|--------------------------------------------------------------------------------------------------------------------|-------------------|------------------|--------------------------------------------------------------------------------------------------------------|-------------------|------------------|
|                                                                     | %                                                                  | $\chi^2$     | <i>p</i>         | OR                                                                                                                 | 95% CI            | <i>p</i>         | OR                                                                                                           | 95% CI            | <i>p</i>         |
| <b>Prolonged stay in HASU (&gt;3 weeks)</b>                         |                                                                    |              |                  |                                                                                                                    |                   |                  |                                                                                                              |                   |                  |
| No symptoms to moderate stroke symptoms (NIHSS <16)                 | 23.6                                                               | <b>80.4</b>  | <b>&lt;0.001</b> | 1                                                                                                                  | --                | --               | 1                                                                                                            | --                | --               |
| Moderately-severe to severe stroke (NIHSS ≥16)                      | 66.7                                                               |              |                  | <b>6.57</b>                                                                                                        | <b>4.09-10.55</b> | <b>&lt;0.001</b> | <b>6.89</b>                                                                                                  | <b>4.15-11.43</b> | <b>&lt;0.001</b> |
| <b>Urinary tract infection within 7 days of admission</b>           |                                                                    |              |                  |                                                                                                                    |                   |                  |                                                                                                              |                   |                  |
| No symptoms to moderate stroke symptoms (NIHSS <16)                 | 6.7                                                                | <b>56.1</b>  | <b>&lt;0.001</b> | 1                                                                                                                  | --                | --               | 1                                                                                                            | --                | --               |
| Moderately-severe to severe stroke (NIHSS ≥16)                      | 20.6                                                               |              |                  | <b>2.67</b>                                                                                                        | <b>1.83-3.89</b>  | <b>&lt;0.001</b> | <b>2.97</b>                                                                                                  | <b>1.93-4.57</b>  | <b>&lt;0.001</b> |
| <b>Pneumonia within 7 days of admission</b>                         |                                                                    |              |                  |                                                                                                                    |                   |                  |                                                                                                              |                   |                  |
| No symptoms to moderate stroke symptoms (NIHSS <16)                 | 9.4                                                                | <b>142.1</b> | <b>&lt;0.001</b> | 1                                                                                                                  | --                | --               | 1                                                                                                            | --                | --               |
| Moderately-severe to severe stroke (NIHSS ≥16)                      | 35.9                                                               |              |                  | <b>4.34</b>                                                                                                        | <b>1.72-5.97</b>  | <b>&lt;0.001</b> | <b>5.09</b>                                                                                                  | <b>3.54-7.31</b>  | <b>&lt;0.001</b> |
| <b>Moderately severe to severe disability on discharge (mRS ≥4)</b> |                                                                    |              |                  |                                                                                                                    |                   |                  |                                                                                                              |                   |                  |
| No symptoms to moderate stroke symptoms (NIHSS <16)                 | 26.2                                                               | <b>299.3</b> | <b>&lt;0.001</b> | 1                                                                                                                  | --                | --               | 1                                                                                                            | --                | --               |
| Moderately-severe to severe stroke (NIHSS ≥16)                      | 80.6                                                               |              |                  | <b>10.54</b>                                                                                                       | <b>7.39-15.03</b> | <b>&lt;0.001</b> | <b>10.09</b>                                                                                                 | <b>6.87-14.83</b> | <b>&lt;0.001</b> |
| <b>Inpatient mortality</b>                                          |                                                                    |              |                  |                                                                                                                    |                   |                  |                                                                                                              |                   |                  |
| No symptoms to moderate stroke symptoms (NIHSS <16)                 | 11.2                                                               | <b>389.6</b> | <b>&lt;0.001</b> | 1                                                                                                                  | --                | --               | 1                                                                                                            | --                | --               |
| Moderately-severe to severe stroke (NIHSS ≥16)                      | 59.0                                                               |              |                  | <b>9.99</b>                                                                                                        | <b>7.34-13.58</b> | <b>&lt;0.001</b> | <b>9.56</b>                                                                                                  | <b>6.76-13.52</b> | <b>&lt;0.001</b> |

<sup>†</sup>Co-morbidities: atrial fibrillation, CCF, hypertension, diabetes and previous stroke.

**Table 4.** Analysis of variance to assess the length of stay in HASU for patients without AF and those with AF of different anticoagulation status, and independent t-tests to assess the length of stay in HASU for patients with different stroke severity on arrival.

|                                                                    | Mean (SD) length of stay (days) | Difference from referent group |                     |                  |
|--------------------------------------------------------------------|---------------------------------|--------------------------------|---------------------|------------------|
|                                                                    |                                 | Mean difference                | 95% CI              | <i>p</i>         |
| Free from AF (referent) <sup>†</sup>                               | 15.6 (21.0)                     | --                             | --                  | --               |
| AF with anticoagulation                                            | 16.3 (19.6)                     | 0.8                            | -2.3 to 3.8         | 0.620            |
| AF without anticoagulation                                         | 20.2 (22.9)                     | <b>4.6</b>                     | <b>1.6 to 7.6</b>   | <b>0.002</b>     |
| AF not suitable for anticoagulation                                | 20.3 (24.8)                     | 4.7                            | -0.7 to 10.2        | 0.090            |
| No symptoms to moderate stroke (NIHSS <16) (referent) <sup>‡</sup> | 15.4 (20.6)                     | --                             | --                  | --               |
| Moderately severe to severe stroke (NIHSS ≥16)                     | 35.6 (27.3)                     | <b>20.2</b>                    | <b>15.6 to 24.7</b> | <b>&lt;0.001</b> |

<sup>†</sup>ANOVA with *post-hoc* test by least significant difference:  $F = 3.8$ ,  $p = 0.009$ ; <sup>‡</sup>independent t-test.

1  
2  
3  
4  
5  
6  
7  
8  
9  
10  
11  
12  
13  
14  
15  
16  
17  
18  
19  
20  
21  
22  
23  
24  
25  
26  
27  
28  
29  
30  
31  
32  
33  
34  
35  
36  
37  
38  
39  
40  
41  
42  
43  
44  
45  
46  
47  
48  
49  
50  
51  
52  
53  
54  
55  
56  
57  
58  
59  
60

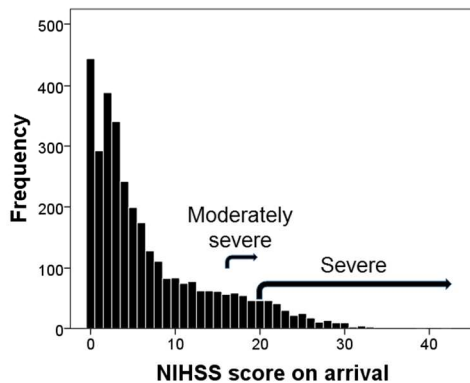

338x190mm (96 x 96 DPI)

review only

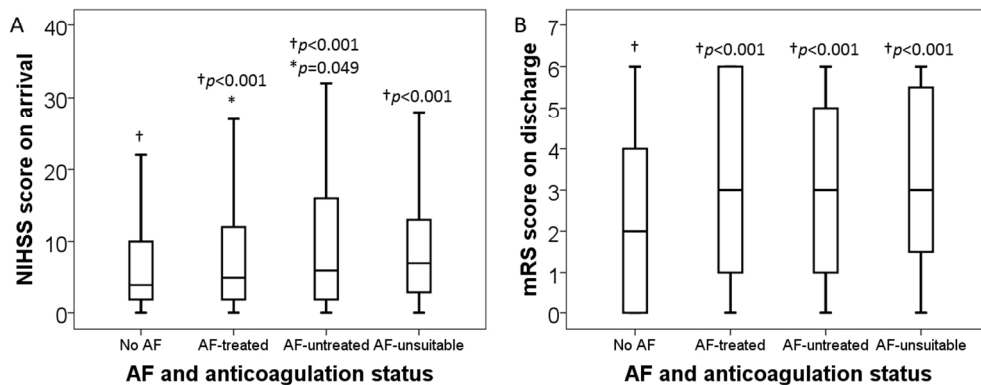

338x190mm (96 x 96 DPI)

review only

1  
2  
3  
4  
5  
6  
7  
8  
9  
10  
11  
12  
13  
14  
15  
16  
17  
18  
19  
20  
21  
22  
23  
24  
25  
26  
27  
28  
29  
30  
31  
32  
33  
34  
35  
36  
37  
38  
39  
40  
41  
42  
43  
44  
45  
46  
47  
48  
49  
50  
51  
52  
53  
54  
55  
56  
57  
58  
59  
60

# BMJ Open

## Evaluation of anticoagulation status for atrial fibrillation on early ischaemic stroke outcomes: a registry-based, prospective cohort study of acute stroke care in Surrey, United Kingdom

|                                 |                                                                                                                                                                                                                                                                                                                                                                                                                                                                                                                    |
|---------------------------------|--------------------------------------------------------------------------------------------------------------------------------------------------------------------------------------------------------------------------------------------------------------------------------------------------------------------------------------------------------------------------------------------------------------------------------------------------------------------------------------------------------------------|
| Journal:                        | <i>BMJ Open</i>                                                                                                                                                                                                                                                                                                                                                                                                                                                                                                    |
| Manuscript ID                   | bmjopen-2017-019122.R1                                                                                                                                                                                                                                                                                                                                                                                                                                                                                             |
| Article Type:                   | Research                                                                                                                                                                                                                                                                                                                                                                                                                                                                                                           |
| Date Submitted by the Author:   | 19-Oct-2017                                                                                                                                                                                                                                                                                                                                                                                                                                                                                                        |
| Complete List of Authors:       | Han, Thang; Institute of Cardiovascular Research, Biological Sciences<br>Fry, Christopher; University of Bristol, School of Physiology, Pharmacology and Neuroscience<br>Fluck, David; Cardiology<br>Affley, Brendan; Stroke<br>Gulli, Giosue; Stroke<br>Barrett, Christopher; Stroke<br>Kakar, Puneet; Stroke<br>Patel, Tasmin; Institute of Cardiovascular Research, Biological Sciences<br>Sharma, Sapna; Institute of Cardiovascular Research, Biological Sciences<br>Sharma, Pankaj; Imperial College London, |
| <b>Primary Subject Heading</b>: | Cardiovascular medicine                                                                                                                                                                                                                                                                                                                                                                                                                                                                                            |
| Secondary Subject Heading:      | Pharmacology and therapeutics, Neurology, Patient-centred medicine                                                                                                                                                                                                                                                                                                                                                                                                                                                 |
| Keywords:                       | Stroke < NEUROLOGY, dysrhythmia, CVD, Length of stay in hospital, disability, mortality                                                                                                                                                                                                                                                                                                                                                                                                                            |
|                                 |                                                                                                                                                                                                                                                                                                                                                                                                                                                                                                                    |

SCHOLARONE™  
Manuscripts

1  
2  
3 **Evaluation of anticoagulation status for atrial fibrillation on early ischaemic stroke**  
4 **outcomes: a registry-based, prospective cohort study of acute stroke care in Surrey,**  
5 **United Kingdom**  
6  
7  
8  
9

10  
11 Thang S Han<sup>1,2</sup>, Christopher H Fry<sup>3</sup>, David Fluck<sup>4</sup>, Brendan Affley<sup>5</sup>, Giosue Gulli<sup>5</sup>,  
12 Christopher Barrett<sup>6</sup>, Puneet Kakar<sup>7</sup>, Tasmin Patel<sup>1</sup>, Sapna Sharma,<sup>1</sup> Pankaj Sharma<sup>1</sup>  
13  
14

15  
16  
17 <sup>1</sup>Institute of Cardiovascular Research, Royal Holloway, University of London, Egham, UK.

18  
19 <sup>2</sup>Department of Endocrinology, Ashford and St Peter's NHS Foundation Trust, Chertsey, UK.

20  
21 <sup>3</sup>School of Physiology, Pharmacology and Neuroscience, University of Bristol, Bristol, UK.

22  
23 Department of <sup>4</sup>Cardiology and <sup>5</sup>Stroke, Ashford and St Peter's NHS Foundation Trust,  
24 Chertsey, UK.  
25

26  
27 <sup>6</sup>Department of Stroke, NHS Frimley Health Foundation Trust, Frimley, UK.

28  
29 <sup>7</sup>Department of Stroke, Epsom and St Helier University Hospitals, Epsom, UK.  
30  
31

32  
33 **Abbreviated title:** AF treatment status and early stroke outcomes.  
34  
35

36  
37 **Key terms:** Dysrhythmia, cardiovascular disease, length of stay in hospital, hospital  
38 acquired pneumonia, NIHSS, mRS, disability, mortality.  
39  
40  
41

42  
43 **Words:** Abstract = 284, text = 2512, 3 tables, 2 figures  
44  
45

46  
47 **Corresponding author:**

48  
49 Dr Thang S Han

50  
51 Institute of Cardiovascular Research

52  
53 Royal Holloway, University of London, Egham, Surrey, TW20 0EX

54  
55 Telephone: 01784443807, Email: t.s.han@doctors.org.uk  
56  
57  
58  
59  
60

## ABSTRACT

**Objective:** The relationship of anticoagulation therapies with stroke severity and outcomes have been well-documented in the literature. However, none of the previous research has reported the relationship of atrial fibrillation (AF)/anticoagulation therapies with urinary tract infection (UTI), pneumonia and length of stay in hyperacute stroke units (HASU). The present study aimed to evaluate AF and anticoagulation status in relation to early outcomes in 1387 men (median age=75yrs, IQR=65-83) and 1371 women (median age=83yrs, IQR=74-89) admitted with acute ischaemic stroke to HASUs in Surrey between 2014-2016.

**Methods:** We conducted this registry-based, prospective cohort study using data from the Sentinel Stroke National Audit Programme. Association between AF anticoagulation status with severe stroke on arrival (National Institutes of Health Stroke Scale score $\geq$ 16), prolonged HASU stay (>3wks), UTI and pneumonia within 7days of admission, severe disability on discharge (modified Rankin Scale score=4 and 5), and inpatient mortality was assessed by logistic regression, adjusted for age, sex, hypertension, congestive heart failure, diabetes and previous stroke.

**Results:** Compared with stroke patients free from AF, those with AF without anticoagulation had an increased adjusted risk of having more severe stroke: 5.8% v.s. 14.0%, OR=2.4 (95%CI:1.6-3.6, $p$ <0.001), prolonged HASU stay: 21.5% v.s. 32.0%, OR=1.4 (1.0-2.0, $p$ =0.027), pneumonia: 8.2% v.s. 19.1%, OR=2.1 (1.4-2.9, $p$ <0.001), more severe disability: 24.2 v.s. 40.4, OR=1.6 (1.2-2.1, $p$ =0.004) and mortality: 9.3% v.s. 21.7%, OR=1.9 (1.4-2.8, $p$ <0.001), and AF patients with anticoagulation also had greater risk for having UTI: 8.6% v.s. 12.3%, OR=1.9 (1.2-3.0, $p$ =0.004), pneumonia: 8.2% v.s. 11.5%, OR=1.6 (1.1-2.4, $p$ =0.025) and mortality: 9.7% v.s. 21.7%, OR=1.9 (1.4-2.8, $p$ <0.001). The median HASU stay for stroke patients with AF without anticoagulation was 10.6days (IQR=2.8-26.4) compared with 5.8days (IQR=2.3-17.5) for those free from AF ( $p$ <0.001).

**Conclusions:** Patients with AF, particularly those without anticoagulation, are at increased risk of severe stroke, associated with prolonged HASU stay and increased risk of early infection, disability, and mortality.

## STRENGTHS AND LIMITATIONS OF THIS STUDY

- The strengths of the present study include its large homogenous cohort of patients derived from one of the largest NHS regions in England.
- The analysis was robustly adjusted for age and sex, as well as major chronic conditions known to associate with stroke including hypertension, congestive heart failure (CHF), diabetes and previous stroke.
- The data were collected by healthcare providers for the patients using national SSNAP protocol.
- Although data are derived only from Surrey it is likely to be representative of the rest of the UK as stroke prevalence is similar to that of the UK.
- The study did not collect information on types of oral anticoagulants, international normalised ratio (INR). Information on the duration of anticoagulation treatment for individual patients was also not available but it is likely to be closely related to their age.



## INTRODUCTION

Each year, about 6.7 million people die of stroke worldwide, accounting for 11.9% of all deaths.[1] Stroke results in adverse health consequences including physical disability and cognitive impairment [2-4] which imposes enormous burdens on patients, their carers as well as social and healthcare systems.[5, 6]

Patients with existing co-morbidities such as diabetes and cardiovascular diseases including coronary heart disease, poorly controlled hypertension or CHF have an increased risk of stroke, but atrial fibrillation (AF) remains the biggest risk factor.[7, 8] Although outcomes for stroke patients have improved significantly in the UK since the introduction of organised hyperacute stroke unit (HASU) care provided by multidisciplinary teams,[9, 10] the elderly and those who have chronic health conditions continue to have increased risk of mortality and disability, as well as time to recovery requiring longer stay in hospital after a stroke.[11-13] The relationship of anticoagulation therapies with stroke severity and outcomes have been well-documented in the literature.[14-16] However, none of the previous research has reported the relationship of AF/anticoagulation therapies with urinary tract infection (UTI), pneumonia and length of stay in HASU.

The present study aimed to evaluate the relationship of patients with AF and their anticoagulation status on the severity of stroke on admission, length of stay in HASU, UTI and pneumonia within the first week in hospital, early disability on discharge and inpatient mortality.

## METHODS

### Study design, patients and setting

We conducted this registry-based, prospective cohort study using data from the Sentinel Stroke National Audit Programme (SSNAP) which is the national register of stroke care in England and Wales. Data were collected prospectively from the time of admission up to six months after stroke and validated by Stroke teams and entered into the SSNAP database via a secure web interface. These data comprise clinical characteristics and care quality of patients admitted to all acute care hospitals in England and Wales with acute ischaemic stroke or primary intracerebral haemorrhage.[12] We used an anonymised extract of a total of 3309 patients from Surrey, a relatively stable and homogenous population, who were admitted to four HASUs within the county (one of the largest National Health Service regions in the England). The hospitals, Ashford and St Peter's (n = 1038), Frimley Park (n = 1010), Royal Surrey County (n = 612) and Epsom (n = 649) were surveyed between January 2014 and February 2016. Twenty-two patients were admitted twice and two patients three times. For the purpose of analysis, data from the first admission for these 24 patients who were admitted multiple times were used.

SSNAP has approval from the Confidentiality Advisory Group of the Health Research Authority to collect patient data under section 251 of the National Health Service Act 2006. No additional ethical approval was sought.

### Socio-demographic factors and medical history

Data were collected for socio-demographic factors including age at arrival, sex and ethnicity, as well as past medical history including AF, hypertension, CHF, diabetes

1  
2  
3 mellitus, previous stroke and drug history. In addition, details of new onset AF cases  
4  
5 as well as UTI and pneumonia acquired in hospital within seven days of admission  
6  
7 were documented by the stroke team comprising consultants and stroke nurse  
8  
9 specialists, including anticoagulation treatment from the point of admission to  
10  
11 discharge.  
12

### 13 14 15 16 **Diagnosis of stroke and severity**

17  
18 Stroke was diagnosed based on clinical presentation and brain CT scan as guided  
19  
20 by the National Institute for Health and Care Excellence (NICE).[17] The severity of  
21  
22 stroke symptoms was assessed by the National Institutes of Health for Stroke Scale  
23  
24 (NIHSS) with score range from no symptoms to severe stroke symptoms (NIHSS  
25  
26 score = 0 to 42).  
27  
28

### 29 30 31 32 **Disability and mortality**

33  
34 Degree of disability or dependence in daily activities were assessed by a modified  
35  
36 Rankin Scale (mRS), ranging from no symptoms to severe symptoms (mRS score =  
37  
38 0 to 5) and mortality (mRS score = 6).  
39  
40

### 41 42 43 **Categorisation of variables**

44  
45 Dichotomisation was applied for hypertension, CHF and diabetes according to the  
46  
47 presence of history of the condition or not while age was dichotomised at the median  
48  
49 value (<79 and ≥79 years). AF and anticoagulation status were categorised into four  
50  
51 groups: free from AF; AF with anticoagulation; AF without anticoagulation; and AF  
52  
53 unsuitable for anticoagulation. Severity of stroke and disability were dichotomised  
54  
55 into two groups: no symptoms to moderate symptoms (NIHSS score <16 and mRS  
56  
57  
58  
59  
60

1  
2  
3 score <4) and moderately-severe to severe (NIHSS score  $\geq 16$  and mRS score = 4  
4 and 5). Prolonged stay in HASU was defined as patients who stayed in a HASU >3  
5 weeks (upper fourth quartile of length of stay).  
6  
7  
8

### 9 10 11 **Statistical analysis**

12  
13  
14 Of the 3309 patients collected in the database, we analysed 2758 (83.3%) patients  
15 presented with ischaemic stroke and the remaining 518 (15.7%) patients with  
16 haemorrhagic stroke and 33 (1.0%) who were unspecified were excluded. The  
17 frequency of patients with AF using anticoagulation before developing an ischaemic  
18 stroke was assessed by cross tabulation and chi-squared tests. Most variables had  
19 no missing data, which were handled in analysis using a 'listwise deletion of missing  
20 data' approach.[18] Independent *t*-tests were performed to compare differences  
21 between two groups and analysis of variance (ANOVA) between three or more  
22 groups, with *post-hoc* analysis where applicable. Multivariable logistic regression  
23 was performed to assess the risk of moderately-severe to severe stroke on arrival  
24 and disability on discharge, inpatient mortality after stroke and prolonged stay in  
25 HASU (dependent variables) from co-morbidities including AF, hypertension, CHF,  
26 diabetes and previous stroke (independent variables). Two logistic regression  
27 models were conducted, the first model was unadjusted and the second adjusted for  
28 age, sex and co-morbidities. Analyses were performed using SPSS V.22.0 (SPSS  
29 Inc, Chicago, Illinois, USA). The null hypothesis was rejected when  $p < 0.05$ .  
30  
31  
32  
33  
34  
35  
36  
37  
38  
39  
40  
41  
42  
43  
44  
45  
46  
47  
48  
49  
50

### 51 **RESULTS**

52  
53 Admissions for stroke were almost equally distributed between men (50.3%) and  
54 women (49.7%), with the onset of the first stroke 6.5 years (95% CI: 5.5, 7.5, *p*  
55  
56  
57  
58  
59  
60

1  
2  
3 <0.001) earlier in men. **Table 1** shows that there were 77.0% of patients presented  
4 with first stroke and 23.0% with recurrent stroke. Most patients were white  
5 Caucasians (92.2%) with the remaining 6.6% comprises mixed race, Black, Asian  
6 and other ethnic populations, and 1.2% not stated. On arrival, 546 (20.4%) patients  
7 had a history of AF, in whom 40.8% were treated in the community with an  
8 anticoagulant whilst 46.1% were untreated although 13.1% had been considered for  
9 anticoagulation and deemed unsuitable by their healthcare providers. Also on arrival,  
10 7.1% of patients had moderate to severe stroke symptoms (NIHSS score = 16-20)  
11 and 6.3% had severe symptoms (NIHSS = 21-42). The remainder had no symptoms  
12 (13.3%, NIHSS = 0); minor (39.6%, NIHSS = 1-4) or moderate (33.7%, NIHSS = 5-  
13 15) symptoms: a more detailed analysis of NIHSS scores is shown in **Figure 1**. On  
14 discharge 10.3% and 4.7% of the original patients respectively had moderately  
15 severe (mRS score = 4) or severe (mRS score = 5) symptoms. The rate of inpatient  
16 mortality was 12.1% (**Table 1**).

17  
18  
19  
20  
21  
22  
23  
24  
25  
26  
27  
28  
29  
30  
31  
32  
33  
34  
35  
36 Baseline characteristics of patients in different categories of AF and anticoagulation  
37 status are shown in **Table 2**. The median age of patients without AF were 77 years  
38 old while those with AF were between 83 and 84 years old. Hypertension, CHF and  
39 moderate to severe stroke were more commonly observed among patients with AF  
40 than those free of AF.

41  
42  
43  
44  
45  
46  
47  
48  
49 Patients free from AF had significantly less severe stroke on admission as reflected  
50 by a lower NIHSS score ( $F = 21.8, p < 0.001$ ) and disability on discharge as indicated  
51 by a lower mRS score ( $F = 20.9, p < 0.001$ ) than patients with AF of any  
52 anticoagulation status (with anticoagulation, without anticoagulation or unsuitable for  
53  
54  
55  
56  
57  
58  
59  
60

1  
2  
3 anticoagulation in the community) (**Figure 2**). ANOVA with *post hoc* analysis by least  
4  
5 significant difference tests showed that NIHSS score on arrival (**Figure 2a**) and mRS  
6  
7 on discharge (**Figure 2b**) were significantly lower ( $p < 0.01$ ) for those free from AF  
8  
9 compared with any of the other three groups of patients with AF (with  
10  
11 anticoagulation, without anticoagulation or unsuitable for anticoagulation). The  
12  
13 NIHSS score for those with AF who were treated with anticoagulant was also lower  
14  
15 than that of those with AF who were not treated with ( $p = 0.011$ ) or considered  
16  
17 unsuitable for anticoagulation ( $p = 0.023$ ).  
18  
19

20  
21  
22 **Table 3** shows that compared with stroke patients free of AF, those with AF but not  
23  
24 anticoagulated had an increased adjusted risk of having more severe stroke (NIHSS  
25  
26 score  $\geq 16$ ): 5.8% v.s. 14.0%, OR = 2.4 (95%CI:1.6-3.6,  $p < 0.001$ ), prolonged HASU  
27  
28 stay: OR = 21.5% v.s. 32.0%, 1.4 (1.0-2.0,  $p = 0.027$ ), pneumonia: 8.2% v.s. 19.1%,  
29  
30 OR = 2.1 (1.4-2.9;  $p < 0.001$ ), more severe disability: 24.2 v.s. 40.4, OR = 1.6 (1.2-  
31  
32 2.1,  $p = 0.004$ ) and mortality: OR = 9.3% v.s. 21.7%, 1.9 (1.4-2.8,  $p < 0.001$ ). Patients  
33  
34 with AF with anticoagulation also had greater risk than those free of AF for having  
35  
36 UTI: OR = 8.6% v.s. 12.3%, 1.9 (1.2-3.0,  $p = 0.004$ ), pneumonia: 8.2% v.s. 11.5%,  
37  
38 OR = 1.6 (1.1-2.4,  $p = 0.025$ ) and mortality: OR = 9.7% v.s. 21.7%, 1.9 (1.4-2.8,  $p$   
39  
40  $< 0.001$ ).  
41  
42  
43  
44  
45

46  
47 The median length of stay in HASU of 5.8 days (IQR = 2.3-17.5 days) for stroke  
48  
49 patients free of AF. In comparison, the corresponding values were 10.6 days (IQR =  
50  
51 2.8-26.4 days) for stroke patients with AF without anticoagulant ( $p < 0.001$ ) and 9.8  
52  
53 days (IQR = 4.0-30.0 days) for stroke patients who were deemed unsuitable for  
54  
55 anticoagulation ( $p = 0.010$ ), while anticoagulation in patients with AF reduced the  
56  
57  
58  
59  
60

1  
2  
3 median length of stay in HASU to 7.1 days (IQR = 3.1-19.3 days) which is not  
4 significantly different from stroke patients free of AF ( $p = 0.062$ ).  
5  
6  
7

8  
9  
10 Among patients with AF who were not anticoagulated or deemed unsuitable for  
11 anticoagulation on admission, 91.8% and 75.0% of these patients respectively were  
12 treated with an anticoagulant on discharge ( $\chi^2 = 16.2, p < 0.001$ ).  
13  
14  
15  
16

## 17 18 **DISCUSSION**

19  
20 We show that compared to patients without a history of AF, those with AF without  
21 anticoagulation had a greater risk of severe stroke (NIHSS score  $\geq 16$ ), prolonged  
22 stay in HASU ( $>3$  weeks), risk of early pneumonia, more severe disability on  
23 discharge (mRS score = 4 and 5) and inpatient mortality by 1.4- to 2.4-fold. Our  
24 study of the association of AF/anticoagulation therapies with pneumonia, UTI and  
25 length of stay in HASU is novel. It is notable that AF patients who were  
26 anticoagulated reduced their risk of severe stroke and length of stay in a HASU to the  
27 same level as those who were free from AF. The increased risk of severe stroke on  
28 arrival, prolonged stay in HASU, more severe disability on discharge and inpatient  
29 mortality in patients with AF without anticoagulation was independent of age, sex,  
30 hypertension, CHF, diabetes and previous stroke.  
31  
32  
33  
34  
35  
36  
37  
38  
39  
40  
41  
42  
43  
44  
45  
46

47 Given the growing ageing population,[19] disability from stroke will continue to  
48 impose massive burdens on healthcare systems in the foreseeable future worldwide,  
49 including the UK. There is therefore a need for early identification of AF, the biggest  
50 treatable risk factor of stroke, through systematic screening of at-risk patients in the  
51 community and intensive treatment for those diagnosed with AF.[20] However, there  
52 is evidence of under-treatment of AF in the community. In the present study, we  
53  
54  
55  
56  
57  
58  
59  
60

1  
2  
3 observed 46.1% of patients with AF who were not on anticoagulation on admission.  
4  
5 This figure is consistent with findings from Passand *et al* [21] who observed that  
6  
7 36.9% of AF patients with CHA2DS2-VASc  $\geq 2$  were not on anticoagulant therapy at  
8  
9 inclusion and from Perez *et al* who found that only 50% of patients with AF who were  
10  
11 eligible for anticoagulation were given this treatment.[22] Similarly Waldo *et al*  
12  
13 studied 945 patients and found that of the 86% of patients who were at high risk of  
14  
15 stroke, only 55% received warfarin.[23] Data from our study revealed that most  
16  
17 patients with AF who were not treated or deemed unsuitable for treatment with an  
18  
19 anticoagulant on admission were subsequently treated on discharge. This suggests  
20  
21 that the number of patients who are actually contraindicated to anticoagulation is  
22  
23 small, with most being simply untreated.  
24  
25  
26  
27  
28

29  
30 Greater collaboration between primary care and specialist cardiology services is  
31  
32 necessary to improve stroke prevention through appropriate treatment of AF. The  
33  
34 roles of experts such as cardiologists, neurologists and haematologists are vital in  
35  
36 providing specialist advice on anticoagulation therapy for patients who pose as a  
37  
38 treatment dilemma for anticoagulation, such as those with a history of bleeding.  
39  
40 Other preventable risk factors such as obesity, hypertension, dyslipidaemia and  
41  
42 hyperglycaemia/insulin resistance [20, 24, 25] should also be managed intensively.  
43  
44  
45  
46  
47

48 A number of important findings emerge from the present study. All patients with AF,  
49  
50 whether treated or untreated with an anticoagulant, have increased risks of early  
51  
52 hospital acquired infections, disability and mortality. This suggests the inherent risk  
53  
54 of AF that may be associated with other causes of cardiovascular disease leads to  
55  
56 worse outcomes of stroke.[26] In the present study, we observed that there was no  
57  
58  
59  
60



1  
2  
3 greater risk for having more severe stroke or prolonged stay in HASU among stroke  
4 patients with AF who were anticoagulated than that of those who were free of AF;  
5 this evidence reinforces the value of intensive treatment of AF with  
6 anticoagulants.[14]  
7  
8  
9  
10

11  
12  
13  
14 The strengths of the present study include its large homogenous cohort of patients  
15 derived from one of the largest NHS regions in England. The analysis was robustly  
16 adjusted for age and sex, as well as major chronic conditions known to associate  
17 with stroke including hypertension, CHF, diabetes, previous stroke and in particular  
18 stroke subtype. The data were collected by healthcare providers for the patients  
19 using national SSNAP protocol. Our study focused on early disability on discharge  
20 and inpatient mortality. It would be of interest to assess the impact of AF  
21 anticoagulation status on these outcomes in longer term. Although data are derived  
22 only from Surrey it is likely to be representative of the rest of the UK as stroke  
23 prevalence is similar to that of the UK.[12] Our study did not collect information on  
24 types of oral anticoagulants or INR which could have some bearing on the outcomes.  
25 This information is beyond the scope of our study. The length of anticoagulation  
26 treatment for individual patients was not available but it is likely that it is closely  
27 related to their age. We chose cut-off point for NIHSS score at 16 based on previous  
28 studies showing that a baseline score of  $\geq 16$  (moderately-severe to severe stroke)  
29 was a strong predictor of mortality or severe disability,[27] while cut-off point for mRS  
30 score at 4 indicates that beyond this point, functional disability begins to worsen due  
31 to increasing severity of stroke.[28] "Prolonged stay" has variably been  
32 described.[29] In the present study, we defined prolonged stay for those who stayed  
33 in HASU  $>3$  weeks as this point reflects the upper quartile of length of stay in HASU.  
34  
35  
36  
37  
38  
39  
40  
41  
42  
43  
44  
45  
46  
47  
48  
49  
50  
51  
52  
53  
54  
55  
56  
57  
58  
59  
60

1  
2  
3 It should be emphasised that these cut-off points tend to be arbitrary and the higher  
4 the level, the more severe is the condition. We have explored various other levels  
5 including cut-off points for NIHSS score at 12, mRS score at 3 and length of stay in  
6 HASU at 1 week (50<sup>th</sup> centile) all showing similar patterns of, but weaker, association  
7 with AF treatment status.  
8  
9  
10  
11  
12

13  
14  
15  
16 In conclusion, patients with AF, particularly those without anticoagulation, are at  
17 increased risk of severe stroke; associated with prolonged HASU stay and increased  
18 risk of early infection, disability and mortality.  
19  
20  
21  
22  
23  
24  
25  
26  
27  
28  
29  
30  
31  
32  
33  
34  
35  
36  
37  
38  
39  
40  
41  
42  
43  
44  
45  
46  
47  
48  
49  
50  
51  
52  
53  
54  
55  
56  
57  
58  
59  
60

1  
2  
3 **Acknowledgements:** The authors wish to thank patients and all those who were  
4 involved in the surveys in the study and Dr Adrian Blight (currently at Department of  
5 Stroke, St George's University Hospitals NHS Foundation Trust) for his contribution  
6 towards data collection from Royal Surrey County Hospital Foundation Trust.  
7  
8  
9  
10

11  
12  
13  
14 **Contributorship:** TSH and PS reviewed the topic related literature. BA, GG, CB, PK  
15 and TP performed the study coordination and data collection. TSH and PS  
16 performed the study concept and analysis design. TSH wrote the first draft, analysed  
17 and interpreted the data and revised the manuscript. CHF, DF, SS and PS edited the  
18 manuscript. All authors checked, interpreted results and approved the final version.  
19 TSH and PS are the guarantors for the study.  
20  
21  
22  
23  
24  
25  
26  
27  
28  
29  
30

31 **Funding:** None.  
32  
33  
34  
35  
36

37 **Competing interests:** The authors declared no potential conflicts of interest with  
38 respect to the research, authorship, and publication of this paper.  
39  
40  
41  
42  
43  
44

45 **Provenance and peer review:** Not commissioned; externally peer reviewed.  
46  
47  
48  
49  
50

51 **Data sharing statement:** No additional data are available.  
52  
53  
54  
55  
56  
57  
58  
59  
60

## REFERECEES

1. [www.who.int/gho/ncd/mortality\\_morbidity/cvd/en/](http://www.who.int/gho/ncd/mortality_morbidity/cvd/en/).
2. Lin HJ, Wolf PA, Kelly-Hayes M, et al. Stroke severity in atrial fibrillation. The Framingham Study. *Stroke* 1996; **27**: 1760-1764.
3. Lamassa M, Di Carlo A, Pracucci G, et al. Characteristics, outcome, and care of stroke associated with atrial fibrillation in Europe: data from a multicenter multinational hospital-based registry (The European Community Stroke Project). *Stroke* 2001; **32**: 392–398.
4. Crichton SL, Bray BD, McKeivitt C, et al. Patient outcomes up to 15 years after stroke: survival, disability, quality of life, cognition and mental health. *J Neurol Neurosurg Psychiatry* 2016; **87**: 1091-1098.
5. Youman P, Wilson K, Harraf F, et al. The economic burden of stroke in the United Kingdom. *Pharmacoeconomics* 2003; **21 Suppl 1**: 43-50.
6. Saka O, McGuire A, Wolfe C. Cost of stroke in the United Kingdom. *Age Ageing* 2009; **38**: 27-32.
7. Wolf PA, Abbott RD, Kannel WB. Atrial fibrillation as an independent risk factor for stroke: the Framingham Study. *Stroke* 1991; **22**: 983-988.
8. Anon. Risk factors for stroke and efficacy of antithrombotic therapy in atrial fibrillation: analysis of pooled data from five randomized controlled trials. *Arch Intern Med* 1994; **154**: 1449-1457.
9. Stroke unit trialists' collaboration. Organised inpatient (stroke unit) care for stroke. In: *Cochrane Library*. Issue 1, 2007.
10. Turner M, Barber M, Dodds H, et al; Scottish Stroke Care Audit. The impact of stroke unit care on outcome in a Scottish stroke population, taking into account case mix and selection bias. *J Neurol Neurosurg Psychiatry* 2015; **86**: 314-318.

- 1  
2  
3 11. Maeshima S, Osawa A, Hayashi T, et al. Elderly age, bilateral lesions, and  
4 severe neurological deficit are correlated with stroke-associated pneumonia. *J*  
5 *Stroke Cerebrovasc Dis* 2014; **23**: 484-489.  
6  
7
- 8  
9 12. Royal College of Physicians, Clinical Effectiveness and Evaluation Unit on behalf  
10 of the Intercollegiate Stroke Working Party. Based on stroke patients admitted to  
11 and/or discharged from hospital between January - March 2016. SSNAP  
12 January - March 2016 Public Report (June 2016).  
13  
14
- 15 13. Tam AKH, Bayley MT. A narrative review of the impact of medical comorbidities  
16 on stroke rehabilitation outcomes. *Disabil Rehabil* 2017; **4**: 1-7.  
17  
18
- 19 14. Hylek EM, Go AS, Chang Y, et al. Effect of intensity of oral anticoagulation on  
20 stroke severity and mortality in atrial fibrillation. *N Engl J Med* 2003; **349**: 1019-  
21 1026.  
22  
23
- 24 15. O'Donnell M, Oczkowski W, Fang J, et al. Preadmission antithrombotic treatment  
25 and stroke severity in patients with atrial fibrillation and acute ischaemic stroke:  
26 an observational study. *Lancet Neurol* 2006; **5**: 749-754.  
27  
28
- 29 16. Xian Y, O'Brien EC, Liang L, et al. Association of preceding antithrombotic  
30 treatment with acute ischemic stroke severity and in-hospital outcomes among  
31 patients with atrial fibrillation. *JAMA* 2017; **317**: 1057-1067.  
32  
33
- 34 17. National-Institute-for-Health-and-Care-Excellence. Atrial fibrillation: the  
35 management of atrial fibrillation. 2014. <http://guidance.nice.org.uk/CG180>  
36 (Clinical guideline 180).  
37  
38
- 39 18. Acock AC. Working with missing values. *J Marriage Fam* 2005; **67**: 1012-1028.  
40  
41
- 42 19. World Health Organization. "World report on ageing and health." *Geneva: World*  
43 *Health Organization* (2015).  
44  
45  
46  
47  
48  
49  
50  
51  
52  
53  
54  
55  
56  
57  
58  
59  
60

- 1  
2  
3 20. Feigin VL, Roth GA, Naghavi M, et al; Global Burden of Diseases, Injuries and  
4 Risk Factors Study 2013 and Stroke Experts Writing Group. Global burden of  
5 stroke and risk factors in 188 countries, during 1990-2013: a systematic analysis  
6 for the Global Burden of Disease Study 2013. *Lancet Neurol* 2016; **15**: 913-924.  
7  
8  
9  
10  
11 21. Perez I, Melbourn A, Kalra L. Use of antithrombotic measures for stroke  
12 prevention in atrial fibrillation. *Heart* 1999; **82**: 570-574.  
13  
14  
15 22. Bassand JP, Accetta G, Camm AJ, et al. Two-year outcomes of patients with  
16 newly diagnosed atrial fibrillation: results from GARFIELD-AF. *Eur Heart J* 2016;  
17 **37**: 2882-2889.  
18  
19  
20  
21  
22 23. Waldo AL, Becker RC, Tapson VF, et al; NABOR Steering Committee.  
23 Hospitalized patients with atrial fibrillation and a high risk of stroke are not being  
24 provided with adequate anticoagulation. *J Am Coll Cardiol* 2005; **46**: 1729-1736.  
25  
26  
27  
28  
29 24. Weir CJ, Murray GD, Dyker AG, et al. Is hyperglycaemia an independent  
30 predictor of poor outcome after acute stroke? Results of a long-term follow up  
31 study. *BMJ* 1997; **314**: 1303-1306.  
32  
33  
34  
35 25. Millionis HJ, Rizos E, Goudevenos J, et al. Components of the metabolic  
36 syndrome and risk for first-ever acute ischemic nonembolic stroke in elderly  
37 subjects. *Stroke* 2005; **36**: 1372-1376.  
38  
39  
40  
41 26. Kamel H, Okin PM, Elkind MS, et al. Atrial fibrillation and mechanisms of stroke:  
42 time for a new model. *Stroke* 2016; **47**: 895-900.  
43  
44  
45  
46  
47 27. Adams HP Jr, Bendixen BH, Leira E, et al. Antithrombotic treatment of ischemic  
48 stroke among patients with occlusion or severe stenosis of the internal carotid  
49 artery: A report of the Trial of Org 10172 in Acute Stroke Treatment (TOAST).  
50 *Neurology* 1999; **53**: 122-125.  
51  
52  
53  
54  
55  
56  
57  
58  
59  
60

- 1  
2  
3 28. Fernandez A1, Schmidt JM, Claassen J, et al. Fever after subarachnoid  
4 hemorrhage: risk factors and impact on outcome. *Neurology* 2007; **68**: 1013-9.  
5  
6  
7 29. Stein M, Misselwitz B, Hamann GF, et al. Defining prolonged length of acute  
8 care stay for surgically and conservatively treated patients with spontaneous  
9 intracerebral hemorrhage: a population-based analysis. *Biomed Res Int* 2016;  
10 2016:9095263.  
11  
12  
13  
14  
15  
16  
17  
18  
19  
20  
21  
22  
23  
24  
25  
26  
27  
28  
29  
30  
31  
32  
33  
34  
35  
36  
37  
38  
39  
40  
41  
42  
43  
44  
45  
46  
47  
48  
49  
50  
51  
52  
53  
54  
55  
56  
57  
58  
59  
60

## LEGENDS

**Figure 1.** Distribution of patients against severity of stroke on admission based on NIHSS score.

**Figure 2.** Box plots showing AF and anticoagulation status in relation to stroke severity on arrival indicated by NIHSS score (a) and severity of disability on discharge indicated by mRS score (b). ANOVA showed significant group differences ( $p < 0.001$ ) therefore *post hoc* least significant difference tests were performed to compare NIHSS score between those †free from AF (No AF) and other three AF groups of different anticoagulation status, and between \*AF with anticoagulation (AF-treated) and AF without anticoagulation (AF-untreated) groups. Box plots representing median and interquartile ranges; whiskers represent the 5th and 95th percentiles.



**Table 1.** Distribution of 2758 patients admitted with acute ischaemic stroke to hospitals in Surrey between January 2014 and February 2016.

|                                                                              | <b>Median</b> | <b>IQR</b>            |
|------------------------------------------------------------------------------|---------------|-----------------------|
| Age of men (years)                                                           | 75.0          | 65.0-83.0             |
| Age of women (years)                                                         | 83.0          | 74.0-89.0             |
|                                                                              | <b>n</b>      | <b>Proportion (%)</b> |
| Men: women                                                                   | 1387: 1371    | 50.3: 49.7            |
| Caucasian: mixed race, Black, Asian and other ethnic populations: not stated | 2544: 180: 34 | 93.4: 6.6: 1.2        |
| First stroke/TIA: Recurrent stroke/TIA                                       | 2123: 635     | 77.0: 23.0            |
| Atrial fibrillation                                                          | 546           | 20.4 <sup>†</sup>     |
| AF with anticoagulation                                                      | 230           | 40.8 <sup>‡</sup>     |
| AF without anticoagulation                                                   | 260           | 46.1 <sup>‡</sup>     |
| AF not suitable for anticoagulation                                          | 74            | 13.1 <sup>‡</sup>     |
| Hypertension                                                                 | 1446          | 52.4                  |
| CHF                                                                          | 171           | 6.2                   |
| Diabetes                                                                     | 463           | 16.8                  |
| <b>Stroke severity on arrival</b>                                            |               |                       |
| No stroke symptoms (NIHSS score: 0)                                          | 368           | 13.3                  |
| Minor stroke (NIHSS score: 1-4)                                              | 1092          | 39.6                  |
| Moderate stroke (NIHSS score: 5-15)                                          | 930           | 33.7                  |
| Moderate to severe stroke (NIHSS score: 16-20)                               | 195           | 7.1                   |
| Severe stroke (NIHSS score: 21-42)                                           | 173           | 6.3                   |
| <b>Modified Rankin Scale on discharge</b>                                    |               |                       |
| No symptoms (mRS score: 0)                                                   | 682           | 24.7                  |
| No significant disability (mRS: 1)                                           | 489           | 17.7                  |
| Slight disability (mRS score: 2)                                             | 377           | 13.7                  |
| Moderate disability (mRS score: 3)                                           | 362           | 13.1                  |
| Moderately severe disability (mRS score: 4)                                  | 284           | 10.3                  |
| Severe disability (mRS score: 5)                                             | 130           | 4.7                   |
| Dead (mRS score: 6)                                                          | 333           | 12.1                  |

<sup>†</sup>Proportion relative to the total number of all patients in the present study (n = 2758);

<sup>‡</sup>Proportion relative to the number of patients with AF (n = 546).

**Table 2. Baseline characteristics of patients admitted with ischaemic stroke according to the AF and anticoagulation status.**

|                                                                   | Non-AF<br>(n = 2194) |            | AF with<br>anticoagulation<br>(n = 230) |            | AF without<br>anticoagulation<br>(n = 260) |            | AF not suitable for<br>anticoagulation<br>(n = 74) |            |
|-------------------------------------------------------------------|----------------------|------------|-----------------------------------------|------------|--------------------------------------------|------------|----------------------------------------------------|------------|
|                                                                   | Median               | IQR        | Median                                  | IQR        | Median                                     | IQR        | Median                                             | IQR        |
| Age (years)                                                       | 77.0                 | 66.0-85.0  | 83.0                                    | 77.0-88.0  | 84.0                                       | 77.0-90.0  | 84.0                                               | 78.8-88.2  |
|                                                                   | <b>n</b>             | <b>%</b>   | <b>n</b>                                | <b>%</b>   | <b>n</b>                                   | <b>%</b>   | <b>n</b>                                           | <b>%</b>   |
| Men: women                                                        | 1133: 1061           | 51.6: 48.4 | 111:119                                 | 48.3: 51.7 | 106:154                                    | 40.8: 59.2 | 37: 37                                             | 50.0: 50.0 |
| Hypertension                                                      | 1093                 | 49.8       | 142                                     | 61.7       | 160                                        | 61.5       | 51                                                 | 68.9       |
| CHF                                                               | 105                  | 4.8        | 28                                      | 12.2       | 10                                         | 13.5       | 171                                                | 6.2        |
| Diabetes                                                          | 364                  | 16.6       | 44                                      | 19.1       | 41                                         | 15.8       | 14                                                 | 18.9       |
| Moderate to severe stroke on arrival<br>(NIHSS score: $\geq 16$ ) | 114                  | 5.2        | 17                                      | 7.4        | 36                                         | 13.8       | 6                                                  | 8.1        |

**Table 3.** Chi-squared test and logistic regression to assess the association of AF and anticoagulation status with moderately-severe to severe stroke (NIHSS score  $\geq 16$ ), UTI and pneumonia within seven days of admission, prolonged stay in HASU, moderately-severe to severe disability (mRS score = 4 and 5) on discharge and mortality.

|                                                                            | Chi-squared test                     |      |             |                  | Logistic regression analysis |                  |                  |                                                    |                  |                  |
|----------------------------------------------------------------------------|--------------------------------------|------|-------------|------------------|------------------------------|------------------|------------------|----------------------------------------------------|------------------|------------------|
|                                                                            | Event rates (%) between study groups |      |             |                  | Unadjusted                   |                  |                  | Adjusted for age, sex, co-morbidities <sup>†</sup> |                  |                  |
|                                                                            | Event rates                          | %    | $\chi^2$    | <i>p</i>         | OR                           | 95% CI           | <i>p</i>         | OR                                                 | 95% CI           | <i>p</i>         |
| <b>Severe stroke on arrival (NIHSS <math>\geq 16</math>)</b>               |                                      |      |             |                  |                              |                  |                  |                                                    |                  |                  |
| Free from AF                                                               | 114/2194                             | 5.8  | <b>30.6</b> | <b>&lt;0.001</b> | 1                            | --               | --               | 1                                                  | --               | --               |
| AF with anticoagulation                                                    | 17/230                               | 8.9  |             |                  | 1.46                         | 0.86-2.47        | 0.164            | 1.24                                               | 0.72-2.13        | 0.440            |
| AF without anticoagulation                                                 | 36/260                               | 14.0 |             |                  | <b>2.93</b>                  | <b>1.97-4.37</b> | <b>&lt;0.001</b> | <b>2.42</b>                                        | <b>1.60-3.64</b> | <b>&lt;0.001</b> |
| AF not suitable for anticoagulation                                        | 6/74                                 | 9.4  |             |                  | 1.61                         | 0.68-3.79        | 0.275            | 1.31                                               | 0.55-3.14        | 0.539            |
| <b>Prolonged stay in HASU (&gt;3 weeks)</b>                                |                                      |      |             |                  |                              |                  |                  |                                                    |                  |                  |
| Free from AF                                                               | 339/1852                             | 21.5 | <b>15.0</b> | <b>0.002</b>     | 1                            | --               | --               | 1                                                  | --               | --               |
| AF with anticoagulation                                                    | 38/169                               | 22.5 |             |                  | 1.06                         | 0.72-1.54        | 0.776            | 0.87                                               | 0.59-1.28        | 0.475            |
| AF without anticoagulation                                                 | 64/200                               | 32.0 |             |                  | <b>1.71</b>                  | <b>1.25-1.35</b> | <b>0.001</b>     | <b>1.42</b>                                        | <b>1.03-1.97</b> | <b>0.034</b>     |
| AF not suitable for anticoagulation                                        | 18/53                                | 34.0 |             |                  | <b>1.87</b>                  | <b>1.05-3.34</b> | <b>0.034</b>     | 1.42                                               | 0.79-2.58        | 0.242            |
| <b>UTI within 7 days of admission</b>                                      |                                      |      |             |                  |                              |                  |                  |                                                    |                  |                  |
| Free from AF                                                               | 119/2116                             | 5.6  | <b>39.5</b> | <b>&lt;0.001</b> | 1                            | --               | --               | 1                                                  | --               | --               |
| AF with anticoagulation                                                    | 27/219                               | 12.3 |             |                  | <b>2.36</b>                  | <b>1.52-3.68</b> | <b>&lt;0.001</b> | <b>1.88</b>                                        | <b>1.18-2.97</b> | <b>0.007</b>     |
| AF without anticoagulation                                                 | 28/257                               | 10.9 |             |                  | 2.05                         | 1.33-3.17        | 0.081            | 1.49                                               | 0.95-2.33        | 0.081            |
| AF not suitable for anticoagulation                                        | 14/70                                | 20.0 |             |                  | <b>4.20</b>                  | <b>2.27-7.75</b> | <b>&lt;0.001</b> | <b>2.96</b>                                        | <b>1.55-5.65</b> | <b>0.001</b>     |
| <b>Pneumonia within 7 days of admission</b>                                |                                      |      |             |                  |                              |                  |                  |                                                    |                  |                  |
| Free from AF                                                               | 173/2116                             | 8.2  | <b>59.5</b> | <b>&lt;0.001</b> | 1                            | --               | --               | 1                                                  | --               | --               |
| AF with anticoagulation                                                    | 34/219                               | 11.5 |             |                  | <b>2.06</b>                  | <b>1.39-3.07</b> | <b>&lt;0.001</b> | <b>1.60</b>                                        | <b>1.06-2.40</b> | <b>0.025</b>     |
| AF without anticoagulation                                                 | 49/257                               | 19.1 |             |                  | <b>2.45</b>                  | <b>1.87-3.75</b> | <b>&lt;0.001</b> | <b>2.05</b>                                        | <b>1.44-2.94</b> | <b>&lt;0.001</b> |
| AF not suitable for anticoagulation                                        | 19/70                                | 21.7 |             |                  | <b>4.18</b>                  | <b>2.42-5.25</b> | <b>&lt;0.001</b> | <b>3.04</b>                                        | <b>1.73-5.37</b> | <b>&lt;0.001</b> |
| <b>Moderately-severe to severe disability on discharge (mRS = 4 and 5)</b> |                                      |      |             |                  |                              |                  |                  |                                                    |                  |                  |
| Free from AF                                                               | 530/2194                             | 24.2 | <b>48.7</b> | <b>&lt;0.001</b> | 1                            | --               | --               | 1                                                  | --               | --               |
| AF with anticoagulation                                                    | 81/230                               | 35.2 |             |                  | <b>1.71</b>                  | <b>1.28-2.28</b> | <b>&lt;0.001</b> | 1.20                                               | 0.90-1.66        | 0.198            |
| AF without anticoagulation                                                 | 105/260                              | 40.4 |             |                  | <b>2.13</b>                  | <b>1.63-2.78</b> | <b>&lt;0.001</b> | <b>1.56</b>                                        | <b>1.18-2.06</b> | <b>0.002</b>     |
| AF not suitable for anticoagulation                                        | 31/74                                | 41.9 |             |                  | <b>2.26</b>                  | <b>1.41-3.63</b> | <b>0.001</b>     | 1.60                                               | 0.97-2.62        | 0.065            |
| <b>Inpatient mortality</b>                                                 |                                      |      |             |                  |                              |                  |                  |                                                    |                  |                  |

1  
2  
3  
4  
5  
6  
7  
8  
9  
10  
11  
12  
13  
14  
15  
16  
17  
18  
19  
20  
21  
22  
23  
24  
25  
26  
27  
28  
29  
30  
31  
32  
33  
34  
35  
36  
37  
38  
39  
40  
41  
42  
43  
44  
45  
46  
47  
48  
49

|                                     |          |      |             |                  |             |                  |                  |             |                  |                  |
|-------------------------------------|----------|------|-------------|------------------|-------------|------------------|------------------|-------------|------------------|------------------|
| Free from AF                        | 212/2194 | 9.7  | <b>58.8</b> | <b>&lt;0.001</b> | <b>1</b>    | <b>--</b>        | <b>--</b>        | <b>1</b>    | <b>--</b>        | <b>--</b>        |
| AF with anticoagulation             | 50/230   | 21.7 |             |                  | <b>2.60</b> | <b>1.84-3.66</b> | <b>&lt;0.001</b> | <b>1.94</b> | <b>1.35-2.78</b> | <b>&lt;0.001</b> |
| AF without anticoagulation          | 55/260   | 21.2 |             |                  | <b>2.51</b> | <b>1.80-3.49</b> | <b>&lt;0.001</b> | <b>1.86</b> | <b>1.32-2.61</b> | <b>&lt;0.001</b> |
| AF not suitable for anticoagulation | 16/74    | 21.6 |             |                  | <b>2.58</b> | <b>1.46-4.57</b> | <b>0.001</b>     | <b>1.83</b> | <b>1.01-3.30</b> | <b>0.046</b>     |

<sup>†</sup>Co-morbidities: CHF, hypertension, diabetes and previous stroke.

For peer review only

1  
2  
3  
4  
5  
6  
7  
8  
9  
10  
11  
12  
13  
14  
15  
16  
17  
18  
19  
20  
21  
22  
23  
24  
25  
26  
27  
28  
29  
30  
31  
32  
33  
34  
35  
36  
37  
38  
39  
40  
41  
42  
43  
44  
45  
46  
47  
48  
49  
50  
51  
52  
53  
54  
55  
56  
57  
58  
59  
60

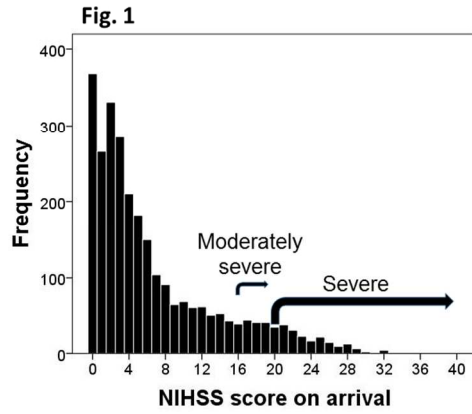

Figure 1

review only

1  
2  
3  
4  
5  
6  
7  
8  
9  
10  
11  
12  
13  
14  
15  
16  
17  
18  
19  
20  
21  
22  
23  
24  
25  
26  
27  
28  
29  
30  
31  
32  
33  
34  
35  
36  
37  
38  
39  
40  
41  
42  
43  
44  
45  
46  
47  
48  
49  
50  
51  
52  
53  
54  
55  
56  
57  
58  
59  
60

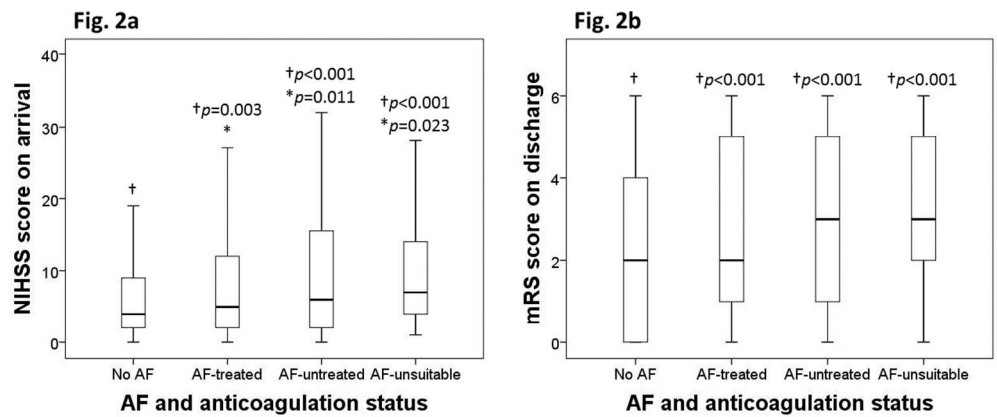

Figure 2 a & b

review only

STROBE 2007 (v4) Statement—Checklist of items that should be included in reports of *cohort studies*

| Section/Topic                | Item # | Recommendation                                                                                                                                                                       | Reported on page # |
|------------------------------|--------|--------------------------------------------------------------------------------------------------------------------------------------------------------------------------------------|--------------------|
| Title and abstract           | 1      | (a) Indicate the study's design with a commonly used term in the title or the abstract                                                                                               | 2                  |
|                              |        | (b) Provide in the abstract an informative and balanced summary of what was done and what was found                                                                                  | 2                  |
| <b>Introduction</b>          |        |                                                                                                                                                                                      |                    |
| Background/rationale         | 2      | Explain the scientific background and rationale for the investigation being reported                                                                                                 | 4                  |
| Objectives                   | 3      | State specific objectives, including any prespecified hypotheses                                                                                                                     | 4                  |
| <b>Methods</b>               |        |                                                                                                                                                                                      |                    |
| Study design                 | 4      | Present key elements of study design early in the paper                                                                                                                              | 5                  |
| Setting                      | 5      | Describe the setting, locations, and relevant dates, including periods of recruitment, exposure, follow-up, and data collection                                                      | 5                  |
| Participants                 | 6      | (a) Give the eligibility criteria, and the sources and methods of selection of participants. Describe methods of follow-up                                                           | 5                  |
|                              |        | (b) For matched studies, give matching criteria and number of exposed and unexposed                                                                                                  | N/A                |
| Variables                    | 7      | Clearly define all outcomes, exposures, predictors, potential confounders, and effect modifiers. Give diagnostic criteria, if applicable                                             | 5-7                |
| Data sources/<br>measurement | 8*     | For each variable of interest, give sources of data and details of methods of assessment (measurement). Describe comparability of assessment methods if there is more than one group | 5-7                |
| Bias                         | 9      | Describe any efforts to address potential sources of bias                                                                                                                            | 11-12              |
| Study size                   | 10     | Explain how the study size was arrived at                                                                                                                                            | 5-7                |
| Quantitative variables       | 11     | Explain how quantitative variables were handled in the analyses. If applicable, describe which groupings were chosen and why                                                         | 5-6                |
| Statistical methods          | 12     | (a) Describe all statistical methods, including those used to control for confounding                                                                                                | 7                  |
|                              |        | (b) Describe any methods used to examine subgroups and interactions                                                                                                                  | N/A                |
|                              |        | (c) Explain how missing data were addressed                                                                                                                                          | 7                  |
|                              |        | (d) If applicable, explain how loss to follow-up was addressed                                                                                                                       | N/A                |
|                              |        | (e) Describe any sensitivity analyses                                                                                                                                                | N/A                |
| <b>Results</b>               |        |                                                                                                                                                                                      |                    |

|                          |     |                                                                                                                                                                                                              |                  |
|--------------------------|-----|--------------------------------------------------------------------------------------------------------------------------------------------------------------------------------------------------------------|------------------|
| Participants             | 13* | (a) Report numbers of individuals at each stage of study—eg numbers potentially eligible, examined for eligibility, confirmed eligible, included in the study, completing follow-up, and analysed            | 5-7              |
|                          |     | (b) Give reasons for non-participation at each stage                                                                                                                                                         | 5-7              |
|                          |     | (c) Consider use of a flow diagram                                                                                                                                                                           | N/A              |
| Descriptive data         | 14* | (a) Give characteristics of study participants (eg demographic, clinical, social) and information on exposures and potential confounders                                                                     | 5 & Tables 1 & 2 |
|                          |     | (b) Indicate number of participants with missing data for each variable of interest                                                                                                                          | Tables 1 & 2     |
|                          |     | (c) Summarise follow-up time (eg, average and total amount)                                                                                                                                                  | 7                |
| Outcome data             | 15* | Report numbers of outcome events or summary measures over time                                                                                                                                               | Table 1          |
| Main results             | 16  | (a) Give unadjusted estimates and, if applicable, confounder-adjusted estimates and their precision (eg, 95% confidence interval). Make clear which confounders were adjusted for and why they were included | Tables 2 & 3     |
|                          |     | (b) Report category boundaries when continuous variables were categorized                                                                                                                                    | 9                |
|                          |     | (c) If relevant, consider translating estimates of relative risk into absolute risk for a meaningful time period                                                                                             | Table 3          |
| Other analyses           | 17  | Report other analyses done—eg analyses of subgroups and interactions, and sensitivity analyses                                                                                                               | N/A              |
| <b>Discussion</b>        |     |                                                                                                                                                                                                              |                  |
| Key results              | 18  | Summarise key results with reference to study objectives                                                                                                                                                     | 10               |
| <b>Limitations</b>       |     |                                                                                                                                                                                                              |                  |
| Interpretation           | 20  | Give a cautious overall interpretation of results considering objectives, limitations, multiplicity of analyses, results from similar studies, and other relevant evidence                                   | 10-13            |
| Generalisability         | 21  | Discuss the generalisability (external validity) of the study results                                                                                                                                        | 10-13            |
| <b>Other information</b> |     |                                                                                                                                                                                                              |                  |
| Funding                  | 22  | Give the source of funding and the role of the funders for the present study and, if applicable, for the original study on which the present article is based                                                | N/A              |

\*Give information separately for cases and controls in case-control studies and, if applicable, for exposed and unexposed groups in cohort and cross-sectional studies.

**Note:** An Explanation and Elaboration article discusses each checklist item and gives methodological background and published examples of transparent reporting. The STROBE checklist is best used in conjunction with this article (freely available on the Web sites of PLoS Medicine at <http://www.plosmedicine.org/>, Annals of Internal Medicine at <http://www.annals.org/>, and Epidemiology at <http://www.epidem.com/>). Information on the STROBE Initiative is available at [www.strobe-statement.org](http://www.strobe-statement.org).



# BMJ Open

## Evaluation of anticoagulation status for atrial fibrillation on early ischaemic stroke outcomes: a registry-based, prospective cohort study of acute stroke care in Surrey, United Kingdom

|                                 |                                                                                                                                                                                                                                                                                                                                                                                                                                                                                                                    |
|---------------------------------|--------------------------------------------------------------------------------------------------------------------------------------------------------------------------------------------------------------------------------------------------------------------------------------------------------------------------------------------------------------------------------------------------------------------------------------------------------------------------------------------------------------------|
| Journal:                        | <i>BMJ Open</i>                                                                                                                                                                                                                                                                                                                                                                                                                                                                                                    |
| Manuscript ID                   | bmjopen-2017-019122.R2                                                                                                                                                                                                                                                                                                                                                                                                                                                                                             |
| Article Type:                   | Research                                                                                                                                                                                                                                                                                                                                                                                                                                                                                                           |
| Date Submitted by the Author:   | 26-Oct-2017                                                                                                                                                                                                                                                                                                                                                                                                                                                                                                        |
| Complete List of Authors:       | Han, Thang; Institute of Cardiovascular Research, Biological Sciences<br>Fry, Christopher; University of Bristol, School of Physiology, Pharmacology and Neuroscience<br>Fluck, David; Cardiology<br>Affley, Brendan; Stroke<br>Gulli, Giosue; Stroke<br>Barrett, Christopher; Stroke<br>Kakar, Puneet; Stroke<br>Patel, Tasmin; Institute of Cardiovascular Research, Biological Sciences<br>Sharma, Sapna; Institute of Cardiovascular Research, Biological Sciences<br>Sharma, Pankaj; Imperial College London, |
| <b>Primary Subject Heading</b>: | Cardiovascular medicine                                                                                                                                                                                                                                                                                                                                                                                                                                                                                            |
| Secondary Subject Heading:      | Pharmacology and therapeutics, Neurology, Patient-centred medicine                                                                                                                                                                                                                                                                                                                                                                                                                                                 |
| Keywords:                       | Stroke < NEUROLOGY, dysrhythmia, CVD, Length of stay in hospital, disability, mortality                                                                                                                                                                                                                                                                                                                                                                                                                            |
|                                 |                                                                                                                                                                                                                                                                                                                                                                                                                                                                                                                    |

SCHOLARONE™  
Manuscripts

1  
2  
3 **Evaluation of anticoagulation status for atrial fibrillation on early ischaemic stroke**  
4 **outcomes: a registry-based, prospective cohort study of acute stroke care in Surrey,**  
5 **United Kingdom**  
6  
7  
8  
9

10  
11 Thang S Han<sup>1,2</sup>, Christopher H Fry<sup>3</sup>, David Fluck<sup>4</sup>, Brendan Affley<sup>5</sup>, Giosue Gulli<sup>5</sup>,  
12 Christopher Barrett<sup>6</sup>, Puneet Kakar<sup>7</sup>, Tasmin Patel<sup>1</sup>, Sapna Sharma,<sup>1</sup> Pankaj Sharma<sup>1</sup>  
13  
14

15  
16  
17 <sup>1</sup>Institute of Cardiovascular Research, Royal Holloway, University of London, Egham, UK.

18  
19 <sup>2</sup>Department of Endocrinology, Ashford and St Peter's NHS Foundation Trust, Chertsey, UK.

20  
21 <sup>3</sup>School of Physiology, Pharmacology and Neuroscience, University of Bristol, Bristol, UK.

22  
23 Department of <sup>4</sup>Cardiology and <sup>5</sup>Stroke, Ashford and St Peter's NHS Foundation Trust,  
24 Chertsey, UK.  
25

26  
27 <sup>6</sup>Department of Stroke, NHS Frimley Health Foundation Trust, Frimley, UK.

28  
29 <sup>7</sup>Department of Stroke, Epsom and St Helier University Hospitals, Epsom, UK.  
30  
31

32  
33 **Abbreviated title:** AF treatment status and early stroke outcomes.  
34  
35

36  
37 **Key terms:** Dysrhythmia, cardiovascular disease, length of stay in hospital, hospital  
38 acquired pneumonia, NIHSS, mRS, disability, mortality.  
39  
40  
41

42  
43 **Words:** Abstract = 284, text = 2512, 3 tables, 2 figures  
44  
45

46  
47 **Corresponding author:**

48  
49 Dr Thang S Han

50  
51 Institute of Cardiovascular Research

52  
53 Royal Holloway, University of London, Egham, Surrey, TW20 0EX

54  
55 Telephone: 01784443807, Email: t.s.han@doctors.org.uk  
56  
57  
58  
59  
60

## ABSTRACT

**Objective:** The relationship of anticoagulation therapies with stroke severity and outcomes have been well-documented in the literature. However, none of the previous research has reported the relationship of atrial fibrillation (AF)/anticoagulation therapies with urinary tract infection (UTI), pneumonia and length of stay in hyperacute stroke units (HASU). The present study aimed to evaluate AF and anticoagulation status in relation to early outcomes in 1387 men (median age=75yrs, IQR=65-83) and 1371 women (median age=83yrs, IQR=74-89) admitted with acute ischaemic stroke to HASUs in Surrey between 2014-2016.

**Methods:** We conducted this registry-based, prospective cohort study using data from the Sentinel Stroke National Audit Programme. Association between AF anticoagulation status with severe stroke on arrival (National Institutes of Health Stroke Scale score $\geq$ 16), prolonged HASU stay (>3wks), UTI and pneumonia within 7days of admission, severe disability on discharge (modified Rankin Scale score=4 and 5), and inpatient mortality was assessed by logistic regression, adjusted for age, sex, hypertension, congestive heart failure, diabetes and previous stroke.

**Results:** Compared with stroke patients free from AF, those with AF without anticoagulation had an increased adjusted risk of having more severe stroke: 5.8% v.s. 14.0%, OR=2.4 (95%CI:1.6-3.6, $p$ <0.001), prolonged HASU stay: 21.5% v.s. 32.0%, OR=1.4 (1.0-2.0, $p$ =0.027), pneumonia: 8.2% v.s. 19.1%, OR=2.1 (1.4-2.9, $p$ <0.001), more severe disability: 24.2 v.s. 40.4, OR=1.6 (1.2-2.1, $p$ =0.004) and mortality: 9.3% v.s. 21.7%, OR=1.9 (1.4-2.8, $p$ <0.001), and AF patients with anticoagulation also had greater risk for having UTI: 8.6% v.s. 12.3%, OR=1.9 (1.2-3.0, $p$ =0.004), pneumonia: 8.2% v.s. 11.5%, OR=1.6 (1.1-2.4, $p$ =0.025) and mortality: 9.7% v.s. 21.7%, OR=1.9 (1.4-2.8, $p$ <0.001). The median HASU stay for stroke patients with AF without anticoagulation was 10.6days (IQR=2.8-26.4) compared with 5.8days (IQR=2.3-17.5) for those free from AF ( $p$ <0.001).

**Conclusions:** Patients with AF, particularly those without anticoagulation, are at increased risk of severe stroke, associated with prolonged HASU stay and increased risk of early infection, disability, and mortality.

## STRENGTHS AND LIMITATIONS OF THIS STUDY

- The strengths of the present study include its large homogenous cohort of patients derived from one of the largest NHS regions in England.
- The analysis was robustly adjusted for age and sex, as well as major chronic conditions known to associate with stroke including hypertension, congestive heart failure (CHF), diabetes and previous stroke.
- The data were collected by healthcare providers for the patients using national SSNAP protocol.
- Although data are derived only from Surrey it is likely to be representative of the rest of the UK as stroke prevalence is similar to that of the UK.
- The study did not collect information on types of oral anticoagulants, international normalised ratio (INR). Information on the duration of anticoagulation treatment for individual patients was also not available but it is likely to be closely related to their age.

## INTRODUCTION

Each year, about 6.7 million people die of stroke worldwide, accounting for 11.9% of all deaths.[1] Stroke results in adverse health consequences including physical disability and cognitive impairment [2-4] which imposes enormous burdens on patients, their carers as well as social and healthcare systems.[5, 6]

Patients with existing co-morbidities such as diabetes and cardiovascular diseases including coronary heart disease, poorly controlled hypertension or CHF have an increased risk of stroke, but atrial fibrillation (AF) remains the biggest risk factor.[7, 8] Although outcomes for stroke patients have improved significantly in the UK since the introduction of organised hyperacute stroke unit (HASU) care provided by multidisciplinary teams,[9, 10] the elderly and those who have chronic health conditions continue to have increased risk of mortality and disability, as well as time to recovery requiring longer stay in hospital after a stroke.[11-13] The relationship of anticoagulation therapies with stroke severity and outcomes have been well-documented in the literature.[14-16] However, none of the previous research has reported the relationship of AF/anticoagulation therapies with urinary tract infection (UTI), pneumonia and length of stay in HASU.

The present study aimed to evaluate the relationship of patients with AF and their anticoagulation status on the severity of stroke on admission, length of stay in HASU, UTI and pneumonia within the first week in hospital, early disability on discharge and inpatient mortality.

## **METHODS**

### **Study design, patients and setting**

We conducted this registry-based, prospective cohort study using data from the Sentinel Stroke National Audit Programme (SSNAP) which is the national register of stroke care in England and Wales. Data were collected prospectively from the time of admission up to six months after stroke and validated by Stroke teams and entered into the SSNAP database via a secure web interface. These data comprise clinical characteristics and care quality of patients admitted to all acute care hospitals in England and Wales with acute ischaemic stroke or primary intracerebral haemorrhage.[12] We used an anonymised extract of a total of 3309 patients from Surrey, a relatively stable and homogenous population, who were admitted to four HASUs within the county (one of the largest National Health Service regions in the England). The hospitals, Ashford and St Peter's (n = 1038), Frimley Park (n = 1010), Royal Surrey County (n = 612) and Epsom (n = 649) were surveyed between January 2014 and February 2016. Twenty-two patients were admitted twice and two patients three times. For the purpose of analysis, data from the first admission for these 24 patients who were admitted multiple times were used.

SSNAP has approval from the Confidentiality Advisory Group of the Health Research Authority to collect patient data under section 251 of the National Health Service Act 2006. No additional ethical approval was sought.

### **Socio-demographic factors and medical history**

Data were collected for socio-demographic factors including age at arrival, sex and ethnicity, as well as past medical history including AF, hypertension, CHF, diabetes

1  
2  
3 mellitus, previous stroke and drug history. In addition, details of new onset AF cases  
4  
5 as well as UTI and pneumonia acquired in hospital within seven days of admission  
6  
7 were documented by the stroke team comprising consultants and stroke nurse  
8  
9 specialists, including anticoagulation treatment from the point of admission to  
10  
11 discharge.  
12

### 13 14 15 16 **Diagnosis of stroke and severity**

17  
18 Stroke was diagnosed based on clinical presentation and brain CT scan as guided  
19  
20 by the National Institute for Health and Care Excellence (NICE).[17] The severity of  
21  
22 stroke symptoms was assessed by the National Institutes of Health for Stroke Scale  
23  
24 (NIHSS) with score range from no symptoms to severe stroke symptoms (NIHSS  
25  
26 score = 0 to 42).  
27  
28

### 29 30 31 32 **Disability and mortality**

33  
34 Degree of disability or dependence in daily activities were assessed by a modified  
35  
36 Rankin Scale (mRS), ranging from no symptoms to severe symptoms (mRS score =  
37  
38 0 to 5) and mortality (mRS score = 6).  
39  
40

### 41 42 43 **Categorisation of variables**

44  
45 Dichotomisation was applied for hypertension, CHF and diabetes according to the  
46  
47 presence of history of the condition or not while age was dichotomised at the median  
48  
49 value (<79 and ≥79 years). AF and anticoagulation status were categorised into four  
50  
51 groups: free from AF; AF with anticoagulation; AF without anticoagulation; and AF  
52  
53 unsuitable for anticoagulation. Severity of stroke and disability were dichotomised  
54  
55 into two groups: no symptoms to moderate symptoms (NIHSS score <16 and mRS  
56  
57  
58  
59  
60

1  
2  
3 score <4) and moderately-severe to severe (NIHSS score  $\geq 16$  and mRS score = 4  
4 and 5). Prolonged stay in HASU was defined as patients who stayed in a HASU >3  
5 weeks (upper fourth quartile of length of stay).  
6  
7  
8

### 9 10 11 **Statistical analysis**

12  
13  
14 Of the 3309 patients collected in the database, we analysed 2758 (83.3%) patients  
15 presented with ischaemic stroke and the remaining 518 (15.7%) patients with  
16 haemorrhagic stroke and 33 (1.0%) who were unspecified were excluded. The  
17 frequency of patients with AF using anticoagulation before developing an ischaemic  
18 stroke was assessed by cross tabulation and chi-squared tests. Most variables had  
19 no missing data, which were handled in analysis using a 'listwise deletion of missing  
20 data' approach.[18] Independent *t*-tests were performed to compare differences  
21 between two groups and analysis of variance (ANOVA) between three or more  
22 groups, with *post-hoc* analysis where applicable. Multivariable logistic regression  
23 was performed to assess the risk of moderately-severe to severe stroke on arrival  
24 and disability on discharge, inpatient mortality after stroke and prolonged stay in  
25 HASU (dependent variables) from co-morbidities including AF, hypertension, CHF,  
26 diabetes and previous stroke (independent variables). Two logistic regression  
27 models were conducted, the first model was unadjusted and the second adjusted for  
28 age, sex and co-morbidities. Analyses were performed using SPSS V.22.0 (SPSS  
29 Inc, Chicago, Illinois, USA). The null hypothesis was rejected when  $p < 0.05$ .  
30  
31  
32  
33  
34  
35  
36  
37  
38  
39  
40  
41  
42  
43  
44  
45  
46  
47  
48  
49  
50

### 51 **RESULTS**

52  
53 Admissions for stroke were almost equally distributed between men (50.3%) and  
54 women (49.7%), with the onset of the first stroke 6.5 years (95% CI: 5.5, 7.5, *p*  
55  
56  
57  
58  
59  
60



1  
2  
3 <0.001) earlier in men. **Table 1** shows that there were 77.0% of patients presented  
4 with first stroke and 23.0% with recurrent stroke. Most patients were white  
5 Caucasians (92.2%) with the remaining 6.6% comprises mixed race, Black, Asian  
6 and other ethnic populations, and 1.2% not stated. On arrival, 546 (20.4%) patients  
7 had a history of AF, in whom 40.8% were treated in the community with an  
8 anticoagulant whilst 46.1% were untreated although 13.1% had been considered for  
9 anticoagulation and deemed unsuitable by their healthcare providers. Also on arrival,  
10 7.1% of patients had moderate to severe stroke symptoms (NIHSS score = 16-20)  
11 and 6.3% had severe symptoms (NIHSS = 21-42). The remainder had no symptoms  
12 (13.3%, NIHSS = 0); minor (39.6%, NIHSS = 1-4) or moderate (33.7%, NIHSS = 5-  
13 15) symptoms: a more detailed analysis of NIHSS scores is shown in **Figure 1**. On  
14 discharge 10.3% and 4.7% of the original patients respectively had moderately  
15 severe (mRS score = 4) or severe (mRS score = 5) symptoms. The rate of inpatient  
16 mortality was 12.1% (**Table 1**).

17  
18  
19  
20  
21  
22  
23  
24  
25  
26  
27  
28  
29  
30  
31  
32  
33  
34  
35  
36 Baseline characteristics of patients in different categories of AF and anticoagulation  
37 status are shown in **Table 2**. The median age of patients without AF were 77 years  
38 old while those with AF were between 83 and 84 years old. Hypertension, CHF and  
39 moderate to severe stroke were more commonly observed among patients with AF  
40 than those free of AF.

41  
42  
43  
44  
45  
46  
47  
48  
49 Patients free from AF had significantly less severe stroke on admission as reflected  
50 by a lower NIHSS score ( $F = 21.8, p < 0.001$ ) and disability on discharge as indicated  
51 by a lower mRS score ( $F = 20.9, p < 0.001$ ) than patients with AF of any  
52 anticoagulation status (with anticoagulation, without anticoagulation or unsuitable for  
53  
54  
55  
56  
57  
58  
59  
60

1  
2  
3 anticoagulation in the community) (**Figure 2**). ANOVA with *post hoc* analysis by least  
4  
5 significant difference tests showed that NIHSS score on arrival (**Figure 2a**) and mRS  
6  
7 on discharge (**Figure 2b**) were significantly lower ( $p < 0.01$ ) for those free from AF  
8  
9 compared with any of the other three groups of patients with AF (with  
10  
11 anticoagulation, without anticoagulation or unsuitable for anticoagulation). The  
12  
13 NIHSS score for those with AF who were treated with anticoagulant was also lower  
14  
15 than that of those with AF who were not treated with ( $p = 0.011$ ) or considered  
16  
17 unsuitable for anticoagulation ( $p = 0.023$ ).  
18  
19

20  
21  
22  
23 **Table 3** shows that compared with stroke patients free of AF, those with AF but not  
24  
25 anticoagulated had an increased adjusted risk of having more severe stroke (NIHSS  
26  
27 score  $\geq 16$ ): 5.8% v.s. 14.0%, OR = 2.4 (95%CI:1.6-3.6,  $p < 0.001$ ), prolonged HASU  
28  
29 stay: OR = 21.5% v.s. 32.0%, 1.4 (1.0-2.0,  $p = 0.027$ ), pneumonia: 8.2% v.s. 19.1%,  
30  
31 OR = 2.1 (1.4-2.9;  $p < 0.001$ ), more severe disability: 24.2 v.s. 40.4, OR = 1.6 (1.2-  
32  
33 2.1,  $p = 0.004$ ) and mortality: OR = 9.3% v.s. 21.7%, 1.9 (1.4-2.8,  $p < 0.001$ ). Patients  
34  
35 with AF with anticoagulation also had greater risk than those free of AF for having  
36  
37 UTI: OR = 8.6% v.s. 12.3%, 1.9 (1.2-3.0,  $p = 0.004$ ), pneumonia: 8.2% v.s. 11.5%,  
38  
39 OR = 1.6 (1.1-2.4,  $p = 0.025$ ) and mortality: OR = 9.7% v.s. 21.7%, 1.9 (1.4-2.8,  $p$   
40  
41  $< 0.001$ ).  
42  
43  
44  
45

46  
47 The median length of stay in HASU of 5.8 days (IQR = 2.3-17.5 days) for stroke  
48  
49 patients free of AF. In comparison, the corresponding values were 10.6 days (IQR =  
50  
51 2.8-26.4 days) for stroke patients with AF without anticoagulant ( $p < 0.001$ ) and 9.8  
52  
53 days (IQR = 4.0-30.0 days) for stroke patients who were deemed unsuitable for  
54  
55 anticoagulation ( $p = 0.010$ ), while anticoagulation in patients with AF reduced the  
56  
57  
58  
59  
60

1  
2  
3 median length of stay in HASU to 7.1 days (IQR = 3.1-19.3 days) which is not  
4 significantly different from stroke patients free of AF ( $p = 0.062$ ).  
5  
6  
7

8  
9  
10 Among patients with AF who were not anticoagulated or deemed unsuitable for  
11 anticoagulation on admission, 91.8% and 75.0% of these patients respectively were  
12 treated with an anticoagulant on discharge ( $\chi^2 = 16.2, p < 0.001$ ).  
13  
14  
15  
16

## 17 18 **DISCUSSION**

19  
20 We show that compared to patients without a history of AF, those with AF without  
21 anticoagulation had a greater risk of severe stroke (NIHSS score  $\geq 16$ ), prolonged  
22 stay in HASU ( $>3$  weeks), risk of early pneumonia, more severe disability on  
23 discharge (mRS score = 4 and 5) and inpatient mortality by 1.4- to 2.4-fold. Our  
24 study of the association of AF/anticoagulation therapies with pneumonia, UTI and  
25 length of stay in HASU is novel. It is notable that AF patients who were  
26 anticoagulated had a reduced risk of severe stroke and length of stay in a HASU to  
27 the same level as those who were free from AF. The increased risk of severe stroke  
28 on arrival, prolonged stay in HASU, more severe disability on discharge and inpatient  
29 mortality in patients with AF without anticoagulation was independent of age, sex,  
30 hypertension, CHF, diabetes and previous stroke.  
31  
32  
33  
34  
35  
36  
37  
38  
39  
40  
41  
42  
43  
44  
45

46  
47 Given the growing ageing population,[19] disability from stroke will continue to  
48 impose massive burdens on healthcare systems in the foreseeable future worldwide,  
49 including the UK. There is therefore a need for early identification of AF, the biggest  
50 treatable risk factor of stroke, through systematic screening of at-risk patients in the  
51 community and intensive treatment for those diagnosed with AF.[20] However, there  
52 is evidence of under-treatment of AF in the community. In the present study, we  
53  
54  
55  
56  
57  
58  
59  
60

1  
2  
3 observed 46.1% of patients with AF who were not on anticoagulation on admission.  
4  
5 This figure is consistent with findings from Bassand *et al* [21] who observed that  
6  
7 36.9% of AF patients with CHA2DS2-VASc  $\geq 2$  were not on anticoagulant therapy at  
8  
9 inclusion and from Perez *et al* who found that only 50% of patients with AF who were  
10  
11 eligible for anticoagulation were given this treatment.[22] Similarly Waldo *et al*  
12  
13 studied 945 patients and found that of the 86% of patients who were at high risk of  
14  
15 stroke, only 55% received warfarin.[23] Data from our study revealed that most  
16  
17 patients with AF who were not treated or deemed unsuitable for treatment with an  
18  
19 anticoagulant on admission were subsequently treated on discharge. This suggests  
20  
21 that the number of patients who are actually contraindicated to anticoagulation is  
22  
23 small, with most being simply untreated.  
24  
25  
26  
27  
28

29  
30 Greater collaboration between primary care and specialist cardiology services is  
31  
32 necessary to improve stroke prevention through appropriate treatment of AF. The  
33  
34 roles of experts such as cardiologists, neurologists and haematologists are vital in  
35  
36 providing specialist advice on anticoagulation therapy for patients who pose as a  
37  
38 treatment dilemma for anticoagulation, such as those with a history of bleeding.  
39  
40 Other preventable risk factors such as obesity, hypertension, dyslipidaemia and  
41  
42 hyperglycaemia/insulin resistance [20, 24, 25] should also be managed intensively.  
43  
44  
45  
46  
47

48 A number of important findings emerge from the present study. All patients with AF,  
49  
50 whether treated or untreated with an anticoagulant, have increased risks of early  
51  
52 hospital acquired infections, disability and mortality. This suggests the inherent risk  
53  
54 of AF that may be associated with other causes of cardiovascular disease leads to  
55  
56 worse outcomes of stroke.[26] In the present study, we observed that there was no  
57  
58  
59  
60

1  
2  
3 greater risk for having more severe stroke or prolonged stay in HASU among stroke  
4 patients with AF who were anticoagulated than that of those who were free of AF;  
5 this evidence reinforces the value of intensive treatment of AF with  
6 anticoagulants.[14]  
7  
8  
9  
10

11  
12  
13  
14 The strengths of the present study include its large homogenous cohort of patients  
15 derived from one of the largest NHS regions in England. The analysis was robustly  
16 adjusted for age and sex, as well as major chronic conditions known to associate  
17 with stroke including hypertension, CHF, diabetes, previous stroke and in particular  
18 stroke subtype. The data were collected by healthcare providers for the patients  
19 using national SSNAP protocol. Our study focused on early disability on discharge  
20 and inpatient mortality. It would be of interest to assess the impact of AF  
21 anticoagulation status on these outcomes in longer term. Although data are derived  
22 only from Surrey it is likely to be representative of the rest of the UK as stroke  
23 prevalence is similar to that of the UK.[12] Our study did not collect information on  
24 types of oral anticoagulants or INR which could have some bearing on the outcomes.  
25 This information is beyond the scope of our study. The length of anticoagulation  
26 treatment for individual patients was not available but it is likely that it is closely  
27 related to their age. We chose cut-off point for NIHSS score at 16 based on previous  
28 studies showing that a baseline score of  $\geq 16$  (moderately-severe to severe stroke)  
29 was a strong predictor of mortality or severe disability,[27] while cut-off point for mRS  
30 score at 4 indicates that beyond this point, functional disability begins to worsen due  
31 to increasing severity of stroke.[28] "Prolonged stay" has variably been  
32 described.[29] In the present study, we defined prolonged stay for those who stayed  
33 in HASU  $>3$  weeks as this point reflects the upper quartile of length of stay in HASU.  
34  
35  
36  
37  
38  
39  
40  
41  
42  
43  
44  
45  
46  
47  
48  
49  
50  
51  
52  
53  
54  
55  
56  
57  
58  
59  
60

1  
2  
3 It should be emphasised that these cut-off points tend to be arbitrary and the higher  
4 the level, the more severe is the condition. We have explored various other levels  
5 including cut-off points for NIHSS score at 12, mRS score at 3 and length of stay in  
6 HASU at 1 week (50<sup>th</sup> centile) all showing similar patterns of, but weaker, association  
7 with AF treatment status.  
8  
9  
10  
11  
12

13  
14  
15  
16 In conclusion, patients with AF, particularly those without anticoagulation, are at  
17 increased risk of severe stroke; associated with prolonged HASU stay and increased  
18 risk of early infection, disability and mortality.  
19  
20  
21  
22  
23  
24  
25  
26  
27  
28  
29  
30  
31  
32  
33  
34  
35  
36  
37  
38  
39  
40  
41  
42  
43  
44  
45  
46  
47  
48  
49  
50  
51  
52  
53  
54  
55  
56  
57  
58  
59  
60

1  
2  
3 **Acknowledgements:** The authors wish to thank patients and all those who were  
4 involved in the surveys in the study and Dr Adrian Blight (currently at Department of  
5 Stroke, St George's University Hospitals NHS Foundation Trust) for his contribution  
6 towards data collection from Royal Surrey County Hospital Foundation Trust.  
7  
8  
9  
10

11  
12  
13  
14 **Contributorship:** TSH and PS reviewed the topic related literature. BA, GG, CB, PK  
15 and TP performed the study coordination and data collection. TSH and PS  
16 performed the study concept and analysis design. TSH wrote the first draft, analysed  
17 and interpreted the data and revised the manuscript. CHF, DF, SS and PS edited the  
18 manuscript. All authors checked, interpreted results and approved the final version.  
19 TSH and PS are the guarantors for the study.  
20  
21  
22  
23  
24  
25  
26  
27  
28  
29  
30  
31

32 **Funding:** None.  
33  
34  
35  
36

37 **Competing interests:** The authors declared no potential conflicts of interest with  
38 respect to the research, authorship, and publication of this paper.  
39  
40  
41  
42  
43  
44

45 **Provenance and peer review:** Not commissioned; externally peer reviewed.  
46  
47  
48  
49  
50

51 **Data sharing statement:** No additional data are available.  
52  
53  
54  
55  
56  
57  
58  
59  
60

## REFERECEES

1. [www.who.int/gho/ncd/mortality\\_morbidity/cvd/en/](http://www.who.int/gho/ncd/mortality_morbidity/cvd/en/).
2. Lin HJ, Wolf PA, Kelly-Hayes M, et al. Stroke severity in atrial fibrillation. The Framingham Study. *Stroke* 1996; **27**: 1760-1764.
3. Lamassa M, Di Carlo A, Pracucci G, et al. Characteristics, outcome, and care of stroke associated with atrial fibrillation in Europe: data from a multicenter multinational hospital-based registry (The European Community Stroke Project). *Stroke* 2001; **32**: 392–398.
4. Crichton SL, Bray BD, McKeivitt C, et al. Patient outcomes up to 15 years after stroke: survival, disability, quality of life, cognition and mental health. *J Neurol Neurosurg Psychiatry* 2016; **87**: 1091-1098.
5. Youman P, Wilson K, Harraf F, et al. The economic burden of stroke in the United Kingdom. *Pharmacoeconomics* 2003; **21 Suppl 1**: 43-50.
6. Saka O, McGuire A, Wolfe C. Cost of stroke in the United Kingdom. *Age Ageing* 2009; **38**: 27-32.
7. Wolf PA, Abbott RD, Kannel WB. Atrial fibrillation as an independent risk factor for stroke: the Framingham Study. *Stroke* 1991; **22**: 983-988.
8. Anon. Risk factors for stroke and efficacy of antithrombotic therapy in atrial fibrillation: analysis of pooled data from five randomized controlled trials. *Arch Intern Med* 1994; **154**: 1449-1457.
9. Stroke unit trialists' collaboration. Organised inpatient (stroke unit) care for stroke. In: *Cochrane Library*. Issue 1, 2007.
10. Turner M, Barber M, Dodds H, et al; Scottish Stroke Care Audit. The impact of stroke unit care on outcome in a Scottish stroke population, taking into account case mix and selection bias. *J Neurol Neurosurg Psychiatry* 2015; **86**: 314-318.



- 1  
2  
3 11. Maeshima S, Osawa A, Hayashi T, et al. Elderly age, bilateral lesions, and  
4 severe neurological deficit are correlated with stroke-associated pneumonia. *J*  
5 *Stroke Cerebrovasc Dis* 2014; **23**: 484-489.  
6  
7
- 8  
9 12. Royal College of Physicians, Clinical Effectiveness and Evaluation Unit on behalf  
10 of the Intercollegiate Stroke Working Party. Based on stroke patients admitted to  
11 and/or discharged from hospital between January - March 2016. SSNAP  
12 January - March 2016 Public Report (June 2016).  
13  
14
- 15 13. Tam AKH, Bayley MT. A narrative review of the impact of medical comorbidities  
16 on stroke rehabilitation outcomes. *Disabil Rehabil* 2017; **4**: 1-7.  
17  
18
- 19 14. Hylek EM, Go AS, Chang Y, et al. Effect of intensity of oral anticoagulation on  
20 stroke severity and mortality in atrial fibrillation. *N Engl J Med* 2003; **349**: 1019-  
21 1026.  
22  
23
- 24 15. O'Donnell M, Oczkowski W, Fang J, et al. Preadmission antithrombotic treatment  
25 and stroke severity in patients with atrial fibrillation and acute ischaemic stroke:  
26 an observational study. *Lancet Neurol* 2006; **5**: 749-754.  
27  
28
- 29 16. Xian Y, O'Brien EC, Liang L, et al. Association of preceding antithrombotic  
30 treatment with acute ischemic stroke severity and in-hospital outcomes among  
31 patients with atrial fibrillation. *JAMA* 2017; **317**: 1057-1067.  
32  
33
- 34 17. National-Institute-for-Health-and-Care-Excellence. Atrial fibrillation: the  
35 management of atrial fibrillation. 2014. <http://guidance.nice.org.uk/CG180>  
36 (Clinical guideline 180).  
37  
38
- 39 18. Acock AC. Working with missing values. *J Marriage Fam* 2005; **67**: 1012-1028.  
40  
41
- 42 19. World Health Organization. "World report on ageing and health." *Geneva: World*  
43 *Health Organization* (2015).  
44  
45  
46  
47  
48  
49  
50  
51  
52  
53  
54  
55  
56  
57  
58  
59  
60

- 1  
2  
3 20. Feigin VL, Roth GA, Naghavi M, et al; Global Burden of Diseases, Injuries and  
4 Risk Factors Study 2013 and Stroke Experts Writing Group. Global burden of  
5 stroke and risk factors in 188 countries, during 1990-2013: a systematic analysis  
6 for the Global Burden of Disease Study 2013. *Lancet Neurol* 2016; **15**: 913-924.  
7  
8  
9  
10  
11 21. Bassand JP, Accetta G, Camm AJ, et al. Two-year outcomes of patients with  
12 newly diagnosed atrial fibrillation: results from GARFIELD-AF. *Eur Heart J* 2016;  
13 **37**: 2882-2889.  
14  
15  
16  
17 22. Perez I, Melbourn A, Kalra L. Use of antithrombotic measures for stroke  
18 prevention in atrial fibrillation. *Heart* 1999; **82**: 570-574.  
19  
20  
21  
22 23. Waldo AL, Becker RC, Tapson VF, et al; NABOR Steering Committee.  
23 Hospitalized patients with atrial fibrillation and a high risk of stroke are not being  
24 provided with adequate anticoagulation. *J Am Coll Cardiol* 2005; **46**: 1729-1736.  
25  
26  
27  
28 24. Weir CJ, Murray GD, Dyker AG, et al. Is hyperglycaemia an independent  
29 predictor of poor outcome after acute stroke? Results of a long-term follow up  
30 study. *BMJ* 1997; **314**: 1303-1306.  
31  
32  
33  
34 25. Millionis HJ, Rizos E, Goudevenos J, et al. Components of the metabolic  
35 syndrome and risk for first-ever acute ischemic nonembolic stroke in elderly  
36 subjects. *Stroke* 2005; **36**: 1372-1376.  
37  
38  
39  
40 26. Kamel H, Okin PM, Elkind MS, et al. Atrial fibrillation and mechanisms of stroke:  
41 time for a new model. *Stroke* 2016; **47**: 895-900.  
42  
43  
44  
45 27. Adams HP Jr, Bendixen BH, Leira E, et al. Antithrombotic treatment of ischemic  
46 stroke among patients with occlusion or severe stenosis of the internal carotid  
47 artery: A report of the Trial of Org 10172 in Acute Stroke Treatment (TOAST).  
48 *Neurology* 1999; **53**: 122-125.  
49  
50  
51  
52  
53  
54  
55  
56  
57  
58  
59  
60

- 1  
2  
3 28. Fernandez A1, Schmidt JM, Claassen J, et al. Fever after subarachnoid  
4 hemorrhage: risk factors and impact on outcome. *Neurology* 2007; **68**: 1013-9.  
5  
6  
7 29. Stein M, Misselwitz B, Hamann GF, et al. Defining prolonged length of acute  
8 care stay for surgically and conservatively treated patients with spontaneous  
9 intracerebral hemorrhage: a population-based analysis. *Biomed Res Int* 2016;  
10 2016:9095263.  
11  
12  
13  
14  
15  
16  
17  
18  
19  
20  
21  
22  
23  
24  
25  
26  
27  
28  
29  
30  
31  
32  
33  
34  
35  
36  
37  
38  
39  
40  
41  
42  
43  
44  
45  
46  
47  
48  
49  
50  
51  
52  
53  
54  
55  
56  
57  
58  
59  
60

## LEGENDS

**Figure 1.** Distribution of patients against severity of stroke on admission based on NIHSS score.

**Figure 2.** Box plots showing AF and anticoagulation status in relation to stroke severity on arrival indicated by NIHSS score (a) and severity of disability on discharge indicated by mRS score (b). ANOVA showed significant group differences ( $p < 0.001$ ) therefore *post hoc* least significant difference tests were performed to compare NIHSS score between those †free from AF (No AF) and other three AF groups of different anticoagulation status, and between \*AF with anticoagulation (AF-treated) and AF without anticoagulation (AF-untreated) groups. Box plots representing median and interquartile ranges; whiskers represent the 5th and 95th percentiles.

**Table 1.** Distribution of 2758 patients admitted with acute ischaemic stroke to hospitals in Surrey between January 2014 and February 2016.

|                                                                              | <b>Median</b> | <b>IQR</b>            |
|------------------------------------------------------------------------------|---------------|-----------------------|
| Age of men (years)                                                           | 75.0          | 65.0-83.0             |
| Age of women (years)                                                         | 83.0          | 74.0-89.0             |
|                                                                              | <b>n</b>      | <b>Proportion (%)</b> |
| Men: women                                                                   | 1387: 1371    | 50.3: 49.7            |
| Caucasian: mixed race, Black, Asian and other ethnic populations: not stated | 2544: 180: 34 | 93.4: 6.6: 1.2        |
| First stroke/TIA: Recurrent stroke/TIA                                       | 2123: 635     | 77.0: 23.0            |
| Atrial fibrillation                                                          | 546           | 20.4 <sup>†</sup>     |
| AF with anticoagulation                                                      | 230           | 40.8 <sup>‡</sup>     |
| AF without anticoagulation                                                   | 260           | 46.1 <sup>‡</sup>     |
| AF not suitable for anticoagulation                                          | 74            | 13.1 <sup>‡</sup>     |
| Hypertension                                                                 | 1446          | 52.4                  |
| CHF                                                                          | 171           | 6.2                   |
| Diabetes                                                                     | 463           | 16.8                  |
| <b>Stroke severity on arrival</b>                                            |               |                       |
| No stroke symptoms (NIHSS score: 0)                                          | 368           | 13.3                  |
| Minor stroke (NIHSS score: 1-4)                                              | 1092          | 39.6                  |
| Moderate stroke (NIHSS score: 5-15)                                          | 930           | 33.7                  |
| Moderate to severe stroke (NIHSS score: 16-20)                               | 195           | 7.1                   |
| Severe stroke (NIHSS score: 21-42)                                           | 173           | 6.3                   |
| <b>Modified Rankin Scale on discharge</b>                                    |               |                       |
| No symptoms (mRS score: 0)                                                   | 682           | 24.7                  |
| No significant disability (mRS: 1)                                           | 489           | 17.7                  |
| Slight disability (mRS score: 2)                                             | 377           | 13.7                  |
| Moderate disability (mRS score: 3)                                           | 362           | 13.1                  |
| Moderately severe disability (mRS score: 4)                                  | 284           | 10.3                  |
| Severe disability (mRS score: 5)                                             | 130           | 4.7                   |
| Dead (mRS score: 6)                                                          | 333           | 12.1                  |

<sup>†</sup>Proportion relative to the total number of all patients in the present study (n = 2758);

<sup>‡</sup>Proportion relative to the number of patients with AF (n = 546).

**Table 2. Baseline characteristics of patients admitted with ischaemic stroke according to the AF and anticoagulation status.**

|                                                                   | Non-AF<br>(n = 2194) |            | AF with<br>anticoagulation<br>(n = 230) |            | AF without<br>anticoagulation<br>(n = 260) |            | AF not suitable for<br>anticoagulation<br>(n = 74) |            |
|-------------------------------------------------------------------|----------------------|------------|-----------------------------------------|------------|--------------------------------------------|------------|----------------------------------------------------|------------|
|                                                                   | Median               | IQR        | Median                                  | IQR        | Median                                     | IQR        | Median                                             | IQR        |
| Age (years)                                                       | 77.0                 | 66.0-85.0  | 83.0                                    | 77.0-88.0  | 84.0                                       | 77.0-90.0  | 84.0                                               | 78.8-88.2  |
|                                                                   | <b>n</b>             | <b>%</b>   | <b>n</b>                                | <b>%</b>   | <b>n</b>                                   | <b>%</b>   | <b>n</b>                                           | <b>%</b>   |
| Men: women                                                        | 1133: 1061           | 51.6: 48.4 | 111:119                                 | 48.3: 51.7 | 106:154                                    | 40.8: 59.2 | 37: 37                                             | 50.0: 50.0 |
| Hypertension                                                      | 1093                 | 49.8       | 142                                     | 61.7       | 160                                        | 61.5       | 51                                                 | 68.9       |
| CHF                                                               | 105                  | 4.8        | 28                                      | 12.2       | 10                                         | 13.5       | 171                                                | 6.2        |
| Diabetes                                                          | 364                  | 16.6       | 44                                      | 19.1       | 41                                         | 15.8       | 14                                                 | 18.9       |
| Moderate to severe stroke on arrival<br>(NIHSS score: $\geq 16$ ) | 114                  | 5.2        | 17                                      | 7.4        | 36                                         | 13.8       | 6                                                  | 8.1        |

**Table 3.** Chi-squared test and logistic regression to assess the association of AF and anticoagulation status with moderately-severe to severe stroke (NIHSS score  $\geq 16$ ), UTI and pneumonia within seven days of admission, prolonged stay in HASU, moderately-severe to severe disability (mRS score = 4 and 5) on discharge and mortality.

|                                                                            | Chi-squared test                     |      |             |                  | Logistic regression analysis |                  |                  |                                                    |                  |                  |
|----------------------------------------------------------------------------|--------------------------------------|------|-------------|------------------|------------------------------|------------------|------------------|----------------------------------------------------|------------------|------------------|
|                                                                            | Event rates (%) between study groups |      |             |                  | Unadjusted                   |                  |                  | Adjusted for age, sex, co-morbidities <sup>†</sup> |                  |                  |
|                                                                            | Event rates                          | %    | $\chi^2$    | <i>p</i>         | OR                           | 95% CI           | <i>p</i>         | OR                                                 | 95% CI           | <i>p</i>         |
| <b>Severe stroke on arrival (NIHSS <math>\geq 16</math>)</b>               |                                      |      |             |                  |                              |                  |                  |                                                    |                  |                  |
| Free from AF                                                               | 114/2194                             | 5.8  | <b>30.6</b> | <b>&lt;0.001</b> | 1                            | --               | --               | 1                                                  | --               | --               |
| AF with anticoagulation                                                    | 17/230                               | 8.9  |             |                  | 1.46                         | 0.86-2.47        | 0.164            | 1.24                                               | 0.72-2.13        | 0.440            |
| AF without anticoagulation                                                 | 36/260                               | 14.0 |             |                  | <b>2.93</b>                  | <b>1.97-4.37</b> | <b>&lt;0.001</b> | <b>2.42</b>                                        | <b>1.60-3.64</b> | <b>&lt;0.001</b> |
| AF not suitable for anticoagulation                                        | 6/74                                 | 9.4  |             |                  | 1.61                         | 0.68-3.79        | 0.275            | 1.31                                               | 0.55-3.14        | 0.539            |
| <b>Prolonged stay in HASU (&gt;3 weeks)</b>                                |                                      |      |             |                  |                              |                  |                  |                                                    |                  |                  |
| Free from AF                                                               | 339/1852                             | 21.5 | <b>15.0</b> | <b>0.002</b>     | 1                            | --               | --               | 1                                                  | --               | --               |
| AF with anticoagulation                                                    | 38/169                               | 22.5 |             |                  | 1.06                         | 0.72-1.54        | 0.776            | 0.87                                               | 0.59-1.28        | 0.475            |
| AF without anticoagulation                                                 | 64/200                               | 32.0 |             |                  | <b>1.71</b>                  | <b>1.25-1.35</b> | <b>0.001</b>     | <b>1.42</b>                                        | <b>1.03-1.97</b> | <b>0.034</b>     |
| AF not suitable for anticoagulation                                        | 18/53                                | 34.0 |             |                  | <b>1.87</b>                  | <b>1.05-3.34</b> | <b>0.034</b>     | 1.42                                               | 0.79-2.58        | 0.242            |
| <b>UTI within 7 days of admission</b>                                      |                                      |      |             |                  |                              |                  |                  |                                                    |                  |                  |
| Free from AF                                                               | 119/2116                             | 5.6  | <b>39.5</b> | <b>&lt;0.001</b> | 1                            | --               | --               | 1                                                  | --               | --               |
| AF with anticoagulation                                                    | 27/219                               | 12.3 |             |                  | <b>2.36</b>                  | <b>1.52-3.68</b> | <b>&lt;0.001</b> | <b>1.88</b>                                        | <b>1.18-2.97</b> | <b>0.007</b>     |
| AF without anticoagulation                                                 | 28/257                               | 10.9 |             |                  | 2.05                         | 1.33-3.17        | 0.081            | 1.49                                               | 0.95-2.33        | 0.081            |
| AF not suitable for anticoagulation                                        | 14/70                                | 20.0 |             |                  | <b>4.20</b>                  | <b>2.27-7.75</b> | <b>&lt;0.001</b> | <b>2.96</b>                                        | <b>1.55-5.65</b> | <b>0.001</b>     |
| <b>Pneumonia within 7 days of admission</b>                                |                                      |      |             |                  |                              |                  |                  |                                                    |                  |                  |
| Free from AF                                                               | 173/2116                             | 8.2  | <b>59.5</b> | <b>&lt;0.001</b> | 1                            | --               | --               | 1                                                  | --               | --               |
| AF with anticoagulation                                                    | 34/219                               | 11.5 |             |                  | <b>2.06</b>                  | <b>1.39-3.07</b> | <b>&lt;0.001</b> | <b>1.60</b>                                        | <b>1.06-2.40</b> | <b>0.025</b>     |
| AF without anticoagulation                                                 | 49/257                               | 19.1 |             |                  | <b>2.45</b>                  | <b>1.87-3.75</b> | <b>&lt;0.001</b> | <b>2.05</b>                                        | <b>1.44-2.94</b> | <b>&lt;0.001</b> |
| AF not suitable for anticoagulation                                        | 19/70                                | 21.7 |             |                  | <b>4.18</b>                  | <b>2.42-5.25</b> | <b>&lt;0.001</b> | <b>3.04</b>                                        | <b>1.73-5.37</b> | <b>&lt;0.001</b> |
| <b>Moderately-severe to severe disability on discharge (mRS = 4 and 5)</b> |                                      |      |             |                  |                              |                  |                  |                                                    |                  |                  |
| Free from AF                                                               | 530/2194                             | 24.2 | <b>48.7</b> | <b>&lt;0.001</b> | 1                            | --               | --               | 1                                                  | --               | --               |
| AF with anticoagulation                                                    | 81/230                               | 35.2 |             |                  | <b>1.71</b>                  | <b>1.28-2.28</b> | <b>&lt;0.001</b> | 1.20                                               | 0.90-1.66        | 0.198            |
| AF without anticoagulation                                                 | 105/260                              | 40.4 |             |                  | <b>2.13</b>                  | <b>1.63-2.78</b> | <b>&lt;0.001</b> | <b>1.56</b>                                        | <b>1.18-2.06</b> | <b>0.002</b>     |
| AF not suitable for anticoagulation                                        | 31/74                                | 41.9 |             |                  | <b>2.26</b>                  | <b>1.41-3.63</b> | <b>0.001</b>     | 1.60                                               | 0.97-2.62        | 0.065            |
| <b>Inpatient mortality</b>                                                 |                                      |      |             |                  |                              |                  |                  |                                                    |                  |                  |

1  
2  
3  
4  
5  
6  
7  
8  
9  
10  
11  
12  
13  
14  
15  
16  
17  
18  
19  
20  
21  
22  
23  
24  
25  
26  
27  
28  
29  
30  
31  
32  
33  
34  
35  
36  
37  
38  
39  
40  
41  
42  
43  
44  
45  
46  
47  
48  
49

|                                     |          |      |             |                  |             |                  |                  |             |                  |                  |
|-------------------------------------|----------|------|-------------|------------------|-------------|------------------|------------------|-------------|------------------|------------------|
| Free from AF                        | 212/2194 | 9.7  | <b>58.8</b> | <b>&lt;0.001</b> | 1           | --               | --               | 1           | --               | --               |
| AF with anticoagulation             | 50/230   | 21.7 |             |                  | <b>2.60</b> | <b>1.84-3.66</b> | <b>&lt;0.001</b> | <b>1.94</b> | <b>1.35-2.78</b> | <b>&lt;0.001</b> |
| AF without anticoagulation          | 55/260   | 21.2 |             |                  | <b>2.51</b> | <b>1.80-3.49</b> | <b>&lt;0.001</b> | <b>1.86</b> | <b>1.32-2.61</b> | <b>&lt;0.001</b> |
| AF not suitable for anticoagulation | 16/74    | 21.6 |             |                  | <b>2.58</b> | <b>1.46-4.57</b> | <b>0.001</b>     | <b>1.83</b> | <b>1.01-3.30</b> | <b>0.046</b>     |

<sup>†</sup>Co-morbidities: CHF, hypertension, diabetes and previous stroke.

For peer review only



1  
2  
3  
4  
5  
6  
7  
8  
9  
10  
11  
12  
13  
14  
15  
16  
17  
18  
19  
20  
21  
22  
23  
24  
25  
26  
27  
28  
29  
30  
31  
32  
33  
34  
35  
36  
37  
38  
39  
40  
41  
42  
43  
44  
45  
46  
47  
48  
49  
50  
51  
52  
53  
54  
55  
56  
57  
58  
59  
60



Figure 1

review only

1  
2  
3  
4  
5  
6  
7  
8  
9  
10  
11  
12  
13  
14  
15  
16  
17  
18  
19  
20  
21  
22  
23  
24  
25  
26  
27  
28  
29  
30  
31  
32  
33  
34  
35  
36  
37  
38  
39  
40  
41  
42  
43  
44  
45  
46  
47  
48  
49  
50  
51  
52  
53  
54  
55  
56  
57  
58  
59  
60



Figure 2 a & b

review only

STROBE 2007 (v4) Statement—Checklist of items that should be included in reports of *cohort studies*

| Section/Topic                | Item # | Recommendation                                                                                                                                                                       | Reported on page # |
|------------------------------|--------|--------------------------------------------------------------------------------------------------------------------------------------------------------------------------------------|--------------------|
| Title and abstract           | 1      | (a) Indicate the study's design with a commonly used term in the title or the abstract                                                                                               | 2                  |
|                              |        | (b) Provide in the abstract an informative and balanced summary of what was done and what was found                                                                                  | 2                  |
| <b>Introduction</b>          |        |                                                                                                                                                                                      |                    |
| Background/rationale         | 2      | Explain the scientific background and rationale for the investigation being reported                                                                                                 | 4                  |
| Objectives                   | 3      | State specific objectives, including any prespecified hypotheses                                                                                                                     | 4                  |
| <b>Methods</b>               |        |                                                                                                                                                                                      |                    |
| Study design                 | 4      | Present key elements of study design early in the paper                                                                                                                              | 5                  |
| Setting                      | 5      | Describe the setting, locations, and relevant dates, including periods of recruitment, exposure, follow-up, and data collection                                                      | 5                  |
| Participants                 | 6      | (a) Give the eligibility criteria, and the sources and methods of selection of participants. Describe methods of follow-up                                                           | 5                  |
|                              |        | (b) For matched studies, give matching criteria and number of exposed and unexposed                                                                                                  | N/A                |
| Variables                    | 7      | Clearly define all outcomes, exposures, predictors, potential confounders, and effect modifiers. Give diagnostic criteria, if applicable                                             | 5-7                |
| Data sources/<br>measurement | 8*     | For each variable of interest, give sources of data and details of methods of assessment (measurement). Describe comparability of assessment methods if there is more than one group | 5-7                |
| Bias                         | 9      | Describe any efforts to address potential sources of bias                                                                                                                            | 11-12              |
| Study size                   | 10     | Explain how the study size was arrived at                                                                                                                                            | 5-7                |
| Quantitative variables       | 11     | Explain how quantitative variables were handled in the analyses. If applicable, describe which groupings were chosen and why                                                         | 5-6                |
| Statistical methods          | 12     | (a) Describe all statistical methods, including those used to control for confounding                                                                                                | 7                  |
|                              |        | (b) Describe any methods used to examine subgroups and interactions                                                                                                                  | N/A                |
|                              |        | (c) Explain how missing data were addressed                                                                                                                                          | 7                  |
|                              |        | (d) If applicable, explain how loss to follow-up was addressed                                                                                                                       | N/A                |
|                              |        | (e) Describe any sensitivity analyses                                                                                                                                                | N/A                |
| <b>Results</b>               |        |                                                                                                                                                                                      |                    |

|                          |     |                                                                                                                                                                                                              |                  |
|--------------------------|-----|--------------------------------------------------------------------------------------------------------------------------------------------------------------------------------------------------------------|------------------|
| Participants             | 13* | (a) Report numbers of individuals at each stage of study—eg numbers potentially eligible, examined for eligibility, confirmed eligible, included in the study, completing follow-up, and analysed            | 5-7              |
|                          |     | (b) Give reasons for non-participation at each stage                                                                                                                                                         | 5-7              |
|                          |     | (c) Consider use of a flow diagram                                                                                                                                                                           | N/A              |
| Descriptive data         | 14* | (a) Give characteristics of study participants (eg demographic, clinical, social) and information on exposures and potential confounders                                                                     | 5 & Tables 1 & 2 |
|                          |     | (b) Indicate number of participants with missing data for each variable of interest                                                                                                                          | Tables 1 & 2     |
|                          |     | (c) Summarise follow-up time (eg, average and total amount)                                                                                                                                                  | 7                |
| Outcome data             | 15* | Report numbers of outcome events or summary measures over time                                                                                                                                               | Table 1          |
| Main results             | 16  | (a) Give unadjusted estimates and, if applicable, confounder-adjusted estimates and their precision (eg, 95% confidence interval). Make clear which confounders were adjusted for and why they were included | Tables 2 & 3     |
|                          |     | (b) Report category boundaries when continuous variables were categorized                                                                                                                                    | 9                |
|                          |     | (c) If relevant, consider translating estimates of relative risk into absolute risk for a meaningful time period                                                                                             | Table 3          |
| Other analyses           | 17  | Report other analyses done—eg analyses of subgroups and interactions, and sensitivity analyses                                                                                                               | N/A              |
| <b>Discussion</b>        |     |                                                                                                                                                                                                              |                  |
| Key results              | 18  | Summarise key results with reference to study objectives                                                                                                                                                     | 10               |
| <b>Limitations</b>       |     |                                                                                                                                                                                                              |                  |
| Interpretation           | 20  | Give a cautious overall interpretation of results considering objectives, limitations, multiplicity of analyses, results from similar studies, and other relevant evidence                                   | 10-13            |
| Generalisability         | 21  | Discuss the generalisability (external validity) of the study results                                                                                                                                        | 10-13            |
| <b>Other information</b> |     |                                                                                                                                                                                                              |                  |
| Funding                  | 22  | Give the source of funding and the role of the funders for the present study and, if applicable, for the original study on which the present article is based                                                | N/A              |

\*Give information separately for cases and controls in case-control studies and, if applicable, for exposed and unexposed groups in cohort and cross-sectional studies.

**Note:** An Explanation and Elaboration article discusses each checklist item and gives methodological background and published examples of transparent reporting. The STROBE checklist is best used in conjunction with this article (freely available on the Web sites of PLoS Medicine at <http://www.plosmedicine.org/>, Annals of Internal Medicine at <http://www.annals.org/>, and Epidemiology at <http://www.epidem.com/>). Information on the STROBE Initiative is available at [www.strobe-statement.org](http://www.strobe-statement.org).
